# Supplementary material for: Pentacenequinone derivatives for preparation of gold nanoparticles: facile synthesis and catalytic application
Source: Royal Society of Chemistry journal article supplement (doi:10.1039/c4ta00397g), 2014-01-01
Supplement: c4ta00397g1.pdf [file c4ta00397g1.pdf]

Supporting Information

**Pentacenequinone derivatives for preparation of gold nanoparticles: Facile Synthesis and Catalytic Application**

Kamaldeep Sharma nee Kamaldeep, Sandeep Kaur, Vandana Bhalla,\* Manoj Kumar and Ankush Gupta  
*Department of Chemistry, UGC Centre for Advanced Studies-I, Guru Nanak Dev University,  
Amritsar, Punjab -143005- INDIA*  
vanmanan@yahoo.co.in

**S3-S5** Comparison table.

**S6** General experimental procedures.

**S7** Synthesis of gold nanoparticles and catalysis of *p*-nitroaniline.

**S8** Absorption spectra of derivative **3** showing the variation of absorption intensity in a H<sub>2</sub>O/THF mixture with different water fractions and pictorial representation of derivative **3**.

**S9** Dependence of I/I<sub>0</sub> ratios of derivative **3** on the solvent composition of the H<sub>2</sub>O/THF mixture and SEM images of aggregates of derivative **3** in 60%, 80% and 90% H<sub>2</sub>O/THF mixture.

**S10** SEM images of aggregates of derivatives **4** and **6** in 60% and 90% H<sub>2</sub>O/THF mixture.

**S11** UV-vis spectra of compound **3** upon additions of various metal ions as their perchlorate and chloride salt in H<sub>2</sub>O/THF.

**S12** Competitive and selectivity graph of derivative **3** to various metal ions and UV-vis spectra of compound **3** upon various additions of Au<sup>3+</sup> ions in H<sub>2</sub>O/THF.

**S13** Graphical representation of rate of formation of gold nanoparticles

**S14** Stern-Volmer plot of aggregates of derivative **3**.

**S15** Fluorescence spectra of derivative **3** upon additions of various metal ions as their perchlorate and chloride salt in H<sub>2</sub>O/THF.

**S16** Overlay <sup>1</sup>H NMR spectra of **3** and gold nanoparticles of **3** after filtration with THF.

**S17** Fourier transforms infrared absorption spectra for compound **3** and gold after filtration with THF.

**S18** UV-vis spectra of compound **3** upon various additions of Au<sup>3+</sup> ions in THF and Polarised optical microscope (POM) image of derivative **3**.

**S19** XRD diffraction patterns of gold nanoparticles of derivative **3** and UV-vis spectra of 4-Bromobenzonitrile (10 μM) upon various additions of Au<sup>3+</sup> ions in H<sub>2</sub>O/THF.

**S20** SEM image of gold nanoparticles of 4-Bromobenzonitrile.

**S21** Absorbance and Fluorescence spectra of compound **4** showing the variation of absorbance and fluorescence intensity in H<sub>2</sub>O/THF mixture from 0 to 90%.

- S22** Absorbance and Fluorescence spectra of compound **6** showing the variation of absorbance and fluorescence intensity in H<sub>2</sub>O/THF mixture from 0 to 90%.
- S23** Absorbance and Fluorescence spectra of **4** upon addition of Au<sup>3+</sup> ions in H<sub>2</sub>O/THF (9/1).
- S24** Absorbance and Fluorescence spectra of **6** upon addition of Au<sup>3+</sup> ions in H<sub>2</sub>O/THF (9/1).
- S25** XRD diffraction patterns of gold nanoparticles of derivatives **4** and **6**.
- S26** Transmission electron microscope (TEM) images and size distribution of gold nanoparticles of derivatives **3**, **4**, and **6**.
- S27** Graphical representation of Time vs. absorbance plot and regression plot for the reduction of *p*-nitroaniline catalyzed by gold nanoparticles of derivatives **3**, **4** and **6**.
- S28** UV-vis spectra for the reduction of *p*-nitroaniline by adding NaBH<sub>4</sub> aqueous solution using gold nanoparticles of derivatives **4** and **6** as catalysts.
- S29** <sup>1</sup>H NMR of spectrum of *p*-phenylenediamine.
- S30** <sup>1</sup>H NMR of spectrum of derivative **3**.
- S31** Mass spectrum of compound **3**.
- S32** <sup>1</sup>H NMR of spectrum of derivative **4**.
- S33** <sup>13</sup>C NMR of spectrum of derivative **4**.
- S34** Mass spectrum of compound **4**.
- S35** <sup>1</sup>H NMR of spectrum of derivative **5**.
- S36** <sup>13</sup>C NMR of spectrum of derivative **5**.
- S37** Mass spectrum of compound **5**.
- S38** <sup>1</sup>H NMR of spectrum of derivative **6**.
- S39** <sup>13</sup>C NMR of spectrum of derivative **6**.
- S40** Mass spectrum of compound **6**.
- S41** Comparison table

**Table S1:** Comparison of present method over other reported procedure in literature for the reduction of *p*-nitroaniline to *p*-phenylenediamine by gold nanoparticles of derivative **3**.

| Reaction time for the reduction of <i>p</i> -nitroaniline to <i>p</i> -phenylenediamine | Journal                                      |
|-----------------------------------------------------------------------------------------|----------------------------------------------|
| 5min.                                                                                   | Present manuscript                           |
| 30 min.                                                                                 | Chem. Sci., 2013, <b>4</b> , 3667.           |
| 59 min.                                                                                 | Ind. Eng. Chem. Res., 2013, <b>52</b> , 556. |
| 25 min.                                                                                 | CrystEngComm, 2012, <b>14</b> , 7600         |
| 70 min.                                                                                 | J. Phys. Chem. C, 2012, <b>116</b> , 23757   |
| 17 min.                                                                                 | Langmuir, 2011, <b>27</b> , 3906             |
| 56 min.                                                                                 | J. Phys. Chem. C, 2009, <b>113</b> , 17730   |
| 20 min.                                                                                 | J. Phys. Chem. C, 2009, <b>113</b> , 5157    |
| 86 min.                                                                                 | J. Phys. Chem. C, 2009, <b>113</b> , 5150    |

**Table S2:** Comparison of present method for the preparation of gold nanoparticles over other reported procedure in literature.

| Method of formation of gold nanoparticles | Size of gold nanoparticles      | Reaction time to prepare gold nanoparticles | Reducing agent or surfactants | Reaction temp. (in °C) | Journals                                        |
|-------------------------------------------|---------------------------------|---------------------------------------------|-------------------------------|------------------------|-------------------------------------------------|
| Wet chemical method                       | 5-10 nm                         | 2 min.                                      | No                            | Room temp.             | Present manuscript                              |
| Ultrasound assisted interfacial method    | 143.9 ± 17.5-249.1 ± 31.3 nm    | 120 sec.                                    | 2-ethoxyaniline (EOA)         | 45                     | Chem. Commun., 2013, <b>49</b> , 987            |
| Chemical method                           | 12 nm                           | 10 min.                                     | NaBH <sub>4</sub>             | 0                      | J. Mater. Chem.C,2013, <b>1</b> , 902.          |
| Chemical method                           | 20 nm                           | 2 min                                       | Glycerol                      | Room temp.             | Advances in Nanoparticles, 2013, <b>2</b> , 78  |
| Chemical method                           | 6-17.5 nm                       | -                                           | NaBH <sub>4</sub>             | -                      | Chem. Commun., 2013, <b>49</b> , 3218           |
| Seed-mediated growth method               | 63.6 nm                         | 60 min                                      | NaBH <sub>4</sub>             | 30                     | J. Phys. Chem. C 2012, <b>116</b> , 23757       |
| Chemical method                           | 20-50 nm                        | 90 min                                      | Sodium citrate                | 80-85                  | Nanoscale Research Letters 2012, <b>7</b> , 420 |
| Seed-mediated method                      | 56.4 ± 1.4 nm                   | 2 h                                         | NaBH <sub>4</sub>             | Ice cold solution      | Phys. Chem. Chem. Phys., 2012, <b>14</b> , 9343 |
| Chemical method                           | 50-200 nm                       | 15 min.                                     | Citrate                       | ~100                   | Langmuir, 2010, <b>26</b> , 3585                |
| Chemical method                           | ~20 nm                          | 30 min                                      | Tripotassium citrate          | ~100                   | J. Phys. Chem. B 2006, <b>110</b> , 17813       |
| Wet Chemical method                       | Large size (Hundred nanometers) | Several hours                               | No                            | Room temp.             | Chem. Commun. 2004, 1182                        |
| Wet chemical method                       | Micrometer sized                | Several minutes                             | No                            | Room temp              | Angew. Chem. Int. Ed. 2004, <b>43</b> , 6360    |
| Wet Chemical method                       | 4-33 nm                         | 30-150 min.                                 | -                             | 80                     | Macromol. Rapid Commun. 2003, <b>24</b> , 1024  |
| Wet Chemical method                       | 5-20 nm                         | -                                           | No                            | Room temp              | Chem. Mater. 1999, <b>11</b> , 3268             |

**Table S3:** Comparison of detection limit reported in the present manuscript for detection of gold ions with other reported detection limits in the literature.

| Paper Journal                | System                                                                  | Detection Limit |
|------------------------------|-------------------------------------------------------------------------|-----------------|
| Present Manuscript           | Fluorescent Aggregates<br>H <sub>2</sub> O/THF (6/4 v/v)                | 100 nM          |
| Analyst, 2013, 138, 3638     | Non aggregated form<br>CH <sub>3</sub> CN–HEPES buffer (1/1 v/v)        | 0.6 ppm         |
| Org. Lett. 2012, 14, 5062    | Non aggregated form<br>(0.25% DMSO in HEPES)                            | 0.4 μM          |
| Chem. Commun. 2012, 48, 744  | Non aggregated form<br>EtOH/ PBS buffer ( 1/1 v/v)                      | 320 nM          |
| Chem. Commun. 2011, 47, 4703 | Non aggregated form<br>(0.3% DMF in PBS HEPES)                          | 290 nM          |
| Org. Lett. 2010, 12, 932     | Non aggregated form<br>(Ethanol)                                        | 64 ppb          |
| Org. Lett. 2010, 12, 401     | Non aggregated form<br>CH <sub>3</sub> CN/PBS buffer (1/1 v/v)          | 0.4 ppm         |
| Chem. Commun. 2009, 7218     | Non aggregated form<br>EtOH–HEPES and DMSO–HEPES<br>buffer<br>(1/1 v/v) | 100 ppb         |

**General experimental Procedures:**

All reagents were purchased from Aldrich and were used without further purification. THF was dried over sodium and benzophenone and kept over molecular sieves overnight before use. UV-vis spectra were recorded on a SHIMADZU UV-2450 spectrophotometer, with a quartz cuvette (path length, 1 cm). The cell holder was thermostatted at 25<sup>0</sup> C. The fluorescence spectra were recorded with a SHIMADZU 5301 PC spectrofluorimeter. Scanning electron microscope (SEM) images were obtained with a field-emission scanning electron microscope (SEM CARL ZEISS SUPRA 55). Polarized optical microscope (POM) images were recorded on NIKON ECLIPSE LV100 POL. Elemental analysis (C, H, N) was performed on a Flash EA 1112 CHNS-O analyzer (Thermo Electron Corp.). <sup>1</sup>H was recorded on a JEOL-FT NMR-AL 300 MHz spectrophotometer using CDCl<sub>3</sub> as solvent and tetramethylsilane SiMe<sub>4</sub> as internal standards. UV-vis studies were performed in THF and H<sub>2</sub>O/THF mixture. Data are reported as follows: chemical shifts in ppm ( $\delta$ ), multiplicity (s = singlet, d = doublet, br = broad singlet m = multiplet), coupling constants *J* (Hz), integration, and interpretation. Silica gel (60–120 mesh) was used for column chromatography.

**Synthesis of Gold Nanoparticles.** To a 3 ml solution of compound **3**, **4**, and **6** (0.2 mM) was added 0.1 M AuCl<sub>3</sub> (15 μL for **3**, 45 μL for **4**, 30 μL for **6**) in H<sub>2</sub>O/THF (6:4, v/v). The reaction was stirred at room temperature for 2 min and formations of nanoparticles take place. These nanoparticles solution was used as such in the catalytic experiment.

**Catalysis of *p*-nitroaniline.** 300 μL of 1 mM *p*-nitroaniline, 300 μL of 10 mM NaBH<sub>4</sub> and 5 μL (2.5 nmol) of gold nanoparticles of derivative **3**, **4**, and **6** were mixed. After that, different volumes of deionized water were added to the reaction mixture to nullify the dilution effect. After stirring the reaction mixture, a colour change of the reaction mixture from yellow to colourless was observed which indicate the reduction of *p*-nitroaniline to *p*-phenylenediamine. The reduction of *p*-nitroaniline takes 5 min. in case of derivative **3**, 24 min. in case of **4** and 18 min. in case of derivative **6**. The formation of the reduced product *p*-phenylenediamine was confirmed from the <sup>1</sup>H-NMR spectra (in CDCl<sub>3</sub>) of the product (see pS29). The reduction of *p*-nitroaniline was also carried out in excess. After the complete reduction, the product was purified by column chromatography and found to be in 98% yield. <sup>1</sup>H NMR (400 MHz, CDCl<sub>3</sub>): δ = 3.29 [s, 4H, NH<sub>2</sub>], 6.57 (s, 4H, ArH).

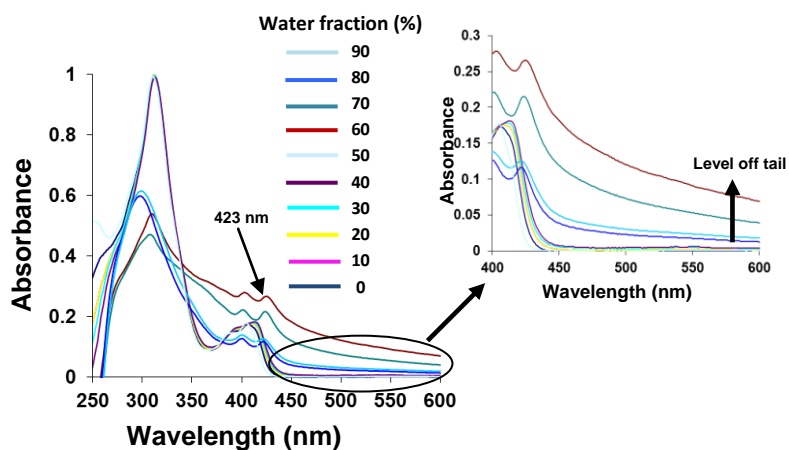

**Fig. S1** Absorption spectra of derivative **3** (10 μM) showing the variation of absorption intensity in H<sub>2</sub>O/THF mixture with different fractions of H<sub>2</sub>O. Inset: enlarge UV-vis spectra of derivative **3** (10 μM) with the addition of H<sub>2</sub>O/THF mixture in the range of 400-600 nm showing level-off long wavelength tail.

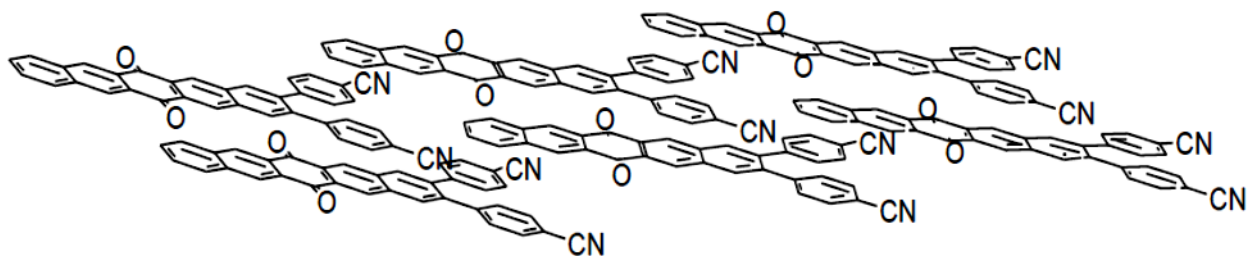

**Fig. S2** Schematic view of intermolecular charge transfer (ICT) state of derivative **3** with their head to tail alignment.



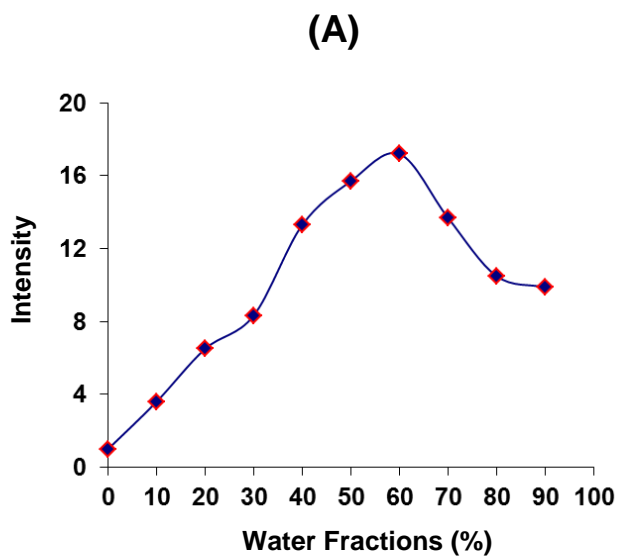

**Fig. S3A** Dependence of  $I/I_0$  ratios of derivative **3** on the solvent composition of the H<sub>2</sub>O/THF mixture.

**(B)**

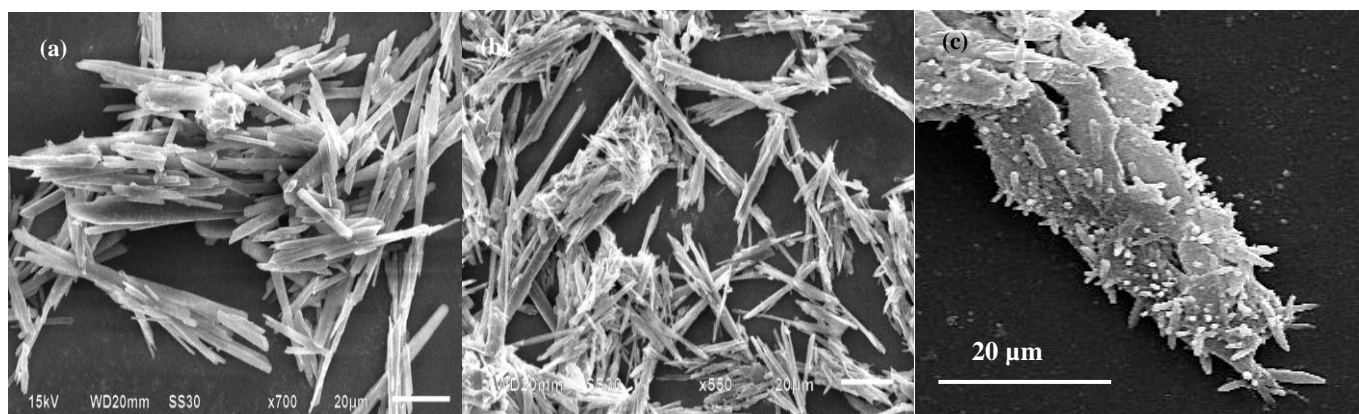

**Fig. S3B** SEM images of aggregates of derivative **3** in (a) 60% H<sub>2</sub>O/THF mixture (b) 80% H<sub>2</sub>O/THF mixture (c) 90% H<sub>2</sub>O/THF mixture. Scale bar (a), (b) and (c) 20  $\mu$ m.

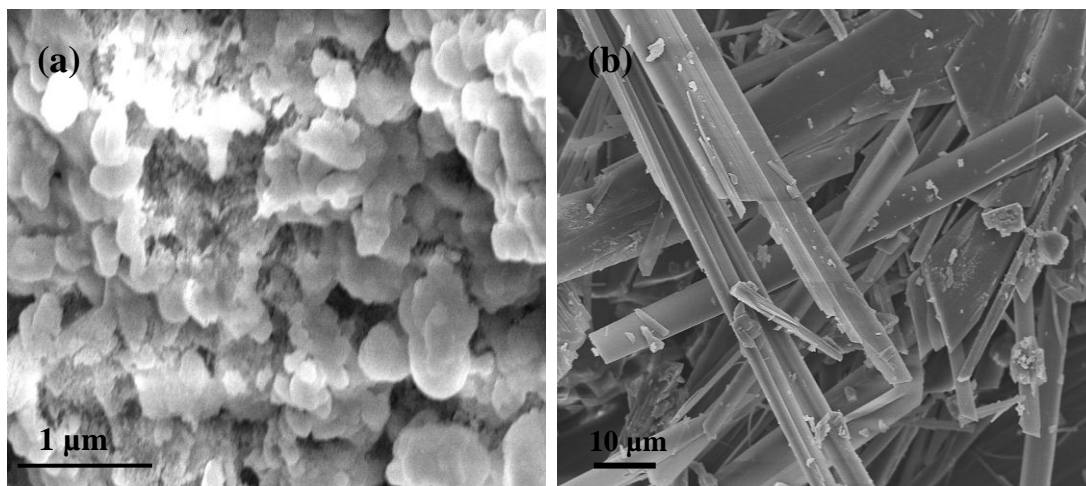

**Fig. S4A** SEM images of aggregates of derivative **4** (a) in 60% H<sub>2</sub>O/THF mixture (b) in 90% H<sub>2</sub>O/THF mixture. Scale bar (a) 1 μm (b) 10 μm.

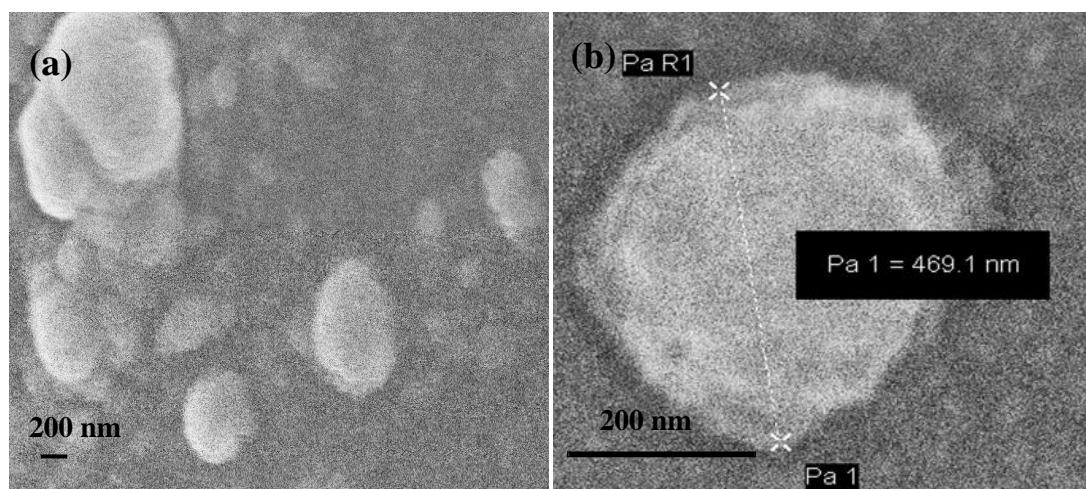

**Fig. S4B** TEM images of aggregates of derivative **6** (a) in 60% H<sub>2</sub>O/THF mixture (b) in 90% H<sub>2</sub>O/THF mixture. Scale bar (a) and (b) 200 nm.

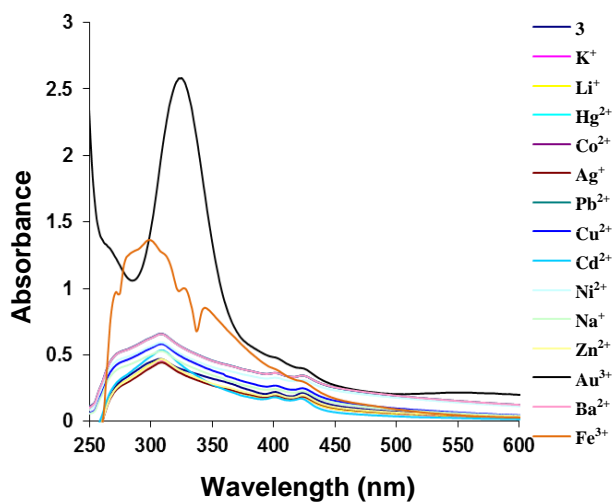

**Fig. S5** UV-vis spectra of derivative **3** (10  $\mu\text{M}$ ) upon additions of 500  $\mu\text{M}$  of various metal ions as their perchlorate salt in  $\text{H}_2\text{O}/\text{THF}$  (6/4), buffered with HEPES,  $\text{pH} = 7.0$ .

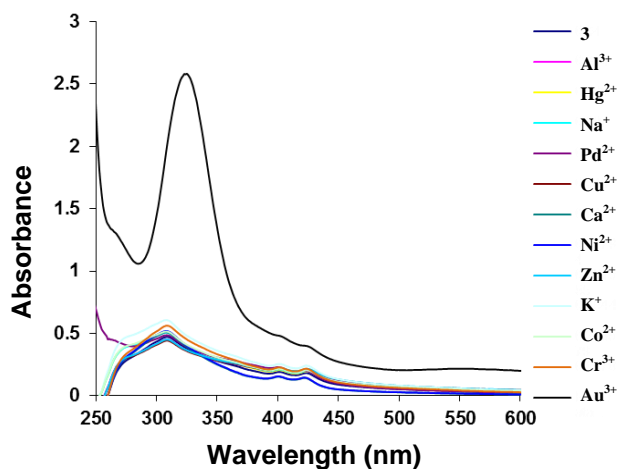

**Fig. S6** UV-vis spectra of derivative **3** (10  $\mu\text{M}$ ) upon additions of 500  $\mu\text{M}$  of various metal ions as their chloride salt in  $\text{H}_2\text{O}/\text{THF}$  (6/4), buffered with HEPES,  $\text{pH} = 7.0$ .

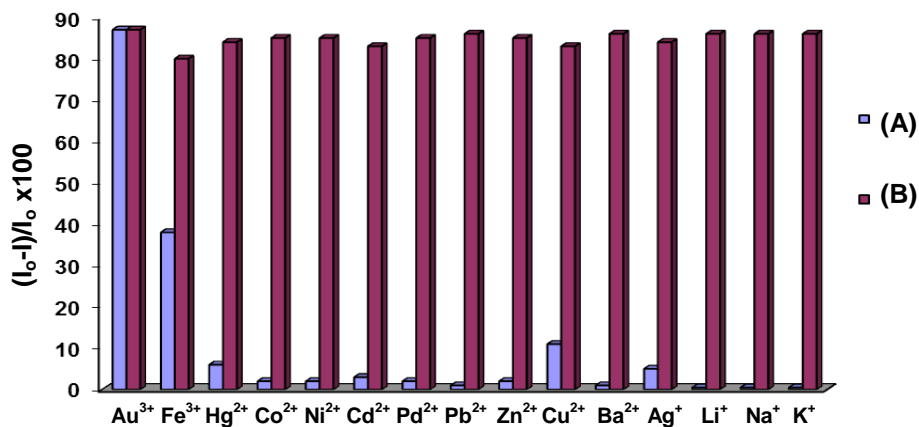

**Fig. S7** Fluorescence response of derivative **3** (10  $\mu\text{M}$ ) to various cations (500  $\mu\text{M}$ ) in  $\text{H}_2\text{O}/\text{THF}$  (6/4); buffered with HEPES,  $\text{pH} = 7.0$ ;  $\lambda_{\text{ex}} = 310 \text{ nm}$ . Bars represent the emission intensity ratio  $(I_0 - I)/I_0 \times 100$  ( $I_0$  = initial fluorescence intensity at 476 nm;  $I$  = final fluorescence intensity at 476 nm after the addition of  $\text{Au}^{3+}$  ions). (A) The sky blue bars represent the addition of individual metal ions, (B) the brown bars represent the change in the emission that occurs upon the subsequent addition of  $\text{Au}^{3+}$  (500  $\mu\text{M}$ ) to the above solution.

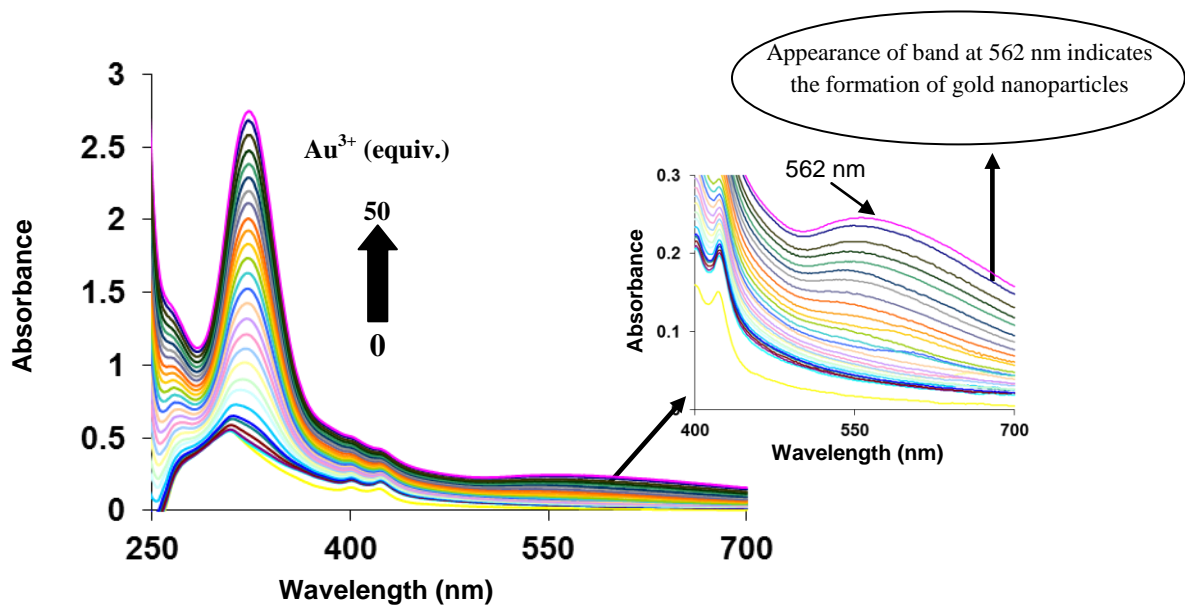

**Fig. S8** UV-vis spectra of derivative **3** (10  $\mu\text{M}$ ) upon various additions of  $\text{Au}^{3+}$  ions in  $\text{H}_2\text{O}/\text{THF}$  (6/4). Inset: enlarge UV spectra of compound **3** (10  $\mu\text{M}$ ) in the range of 400-700 nm.

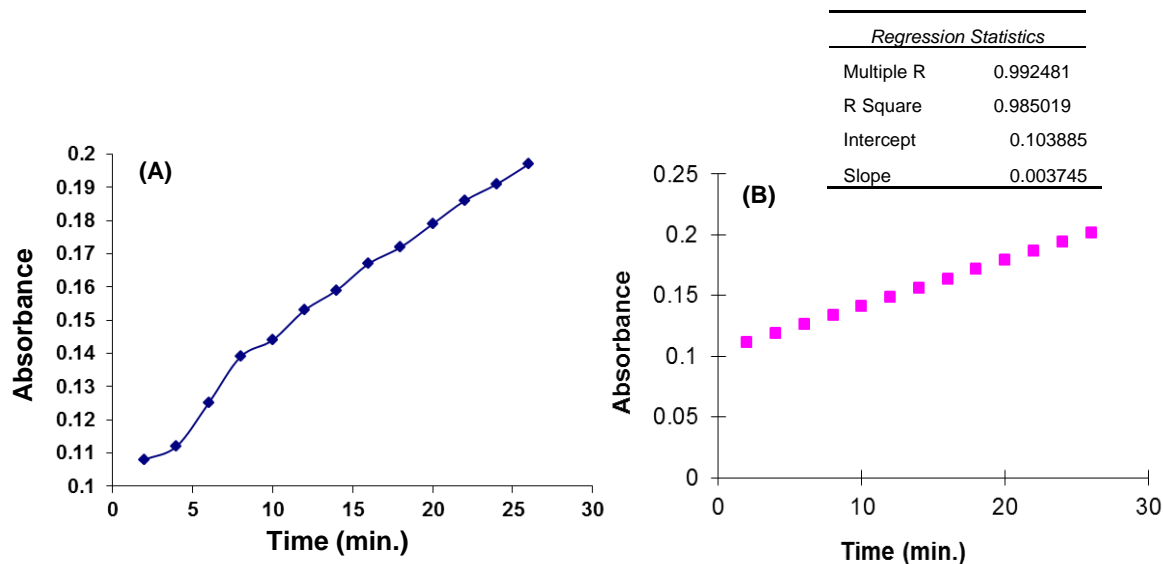

**Fig. S9** Graphical representation of the rate of formation of gold nanoparticles of derivative **3**. (A) Time (min.) vs. absorbance plot at 562 nm (B) regression plot of A.

The first order<sup>1</sup> rate constant for the formation of gold nanoparticles was calculated from the changes of intensity of absorbance of aggregates of derivative **3** in the presence of Au<sup>3+</sup> ions at different time interval<sup>2</sup>.

From the time vs. absorbance plot at fixed wavelength 562 nm by using first order rate equation we get the rate constant =  $k = \text{slope} \times 2.303 = 1.43 \times 10^{-3} \text{ Sec}^{-1}$ .

<sup>1</sup> Luty-Błocho, M.; Paclawski, K.; Wojnicki, M.; Fitzner, K. *Inorganica Chimica Acta* **2013**, 395, 189-196.

<sup>2</sup> Goswami, S.; Das, S.; Aich, K.; Sarkar, D.; Mondal, T. K.; Quah, C. K.; Fun, H-K. *Dalton Trans.* **2013**, 42, 15113–15119.

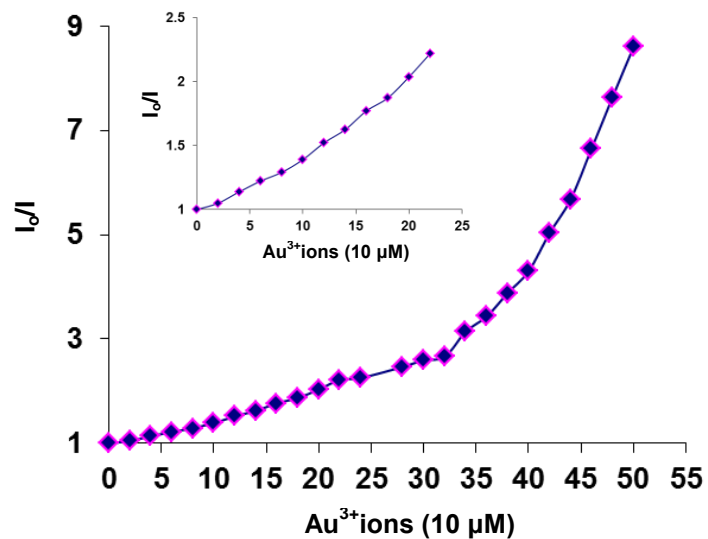

**Fig. S10** Variation of fluorescence intensity of aggregates of derivative **3** (10 μM) at 476 nm in H<sub>2</sub>O/THF (6:4, v/v) buffered with HEPES, pH =7.0, λ<sub>ex.</sub> = 310 nm in the presence of different concentrations of Au<sup>3+</sup> ions (I<sub>0</sub>/I; I<sub>0</sub> = initial fluorescence intensity at 476 nm; I = fluorescence intensity after the addition of Au<sup>3+</sup> ions at 476 nm). Inset shows the linear Stern-Volmer plot at lower concentration of Au<sup>3+</sup> ions.

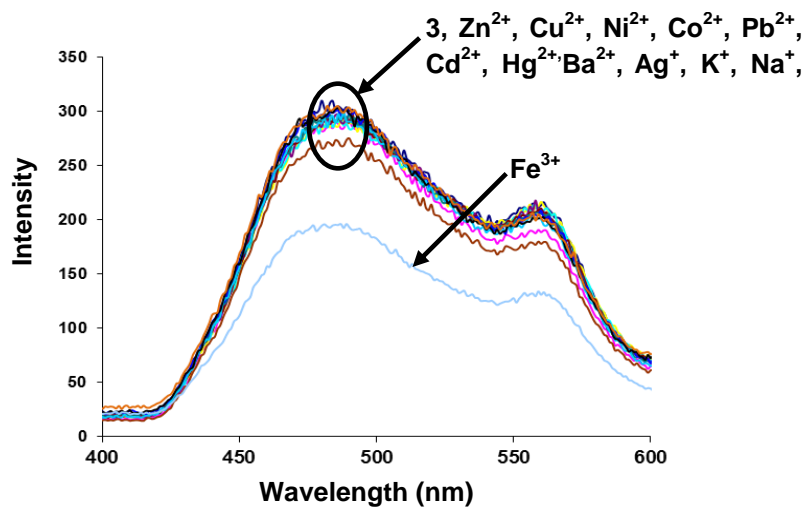

**Fig. S11** Fluorescence spectra of derivative **3** (10 μM) upon additions of various metal ions (500 μM) as their perchlorate salt in H<sub>2</sub>O/THF (6/4) buffered with HEPES, pH = 7.0.

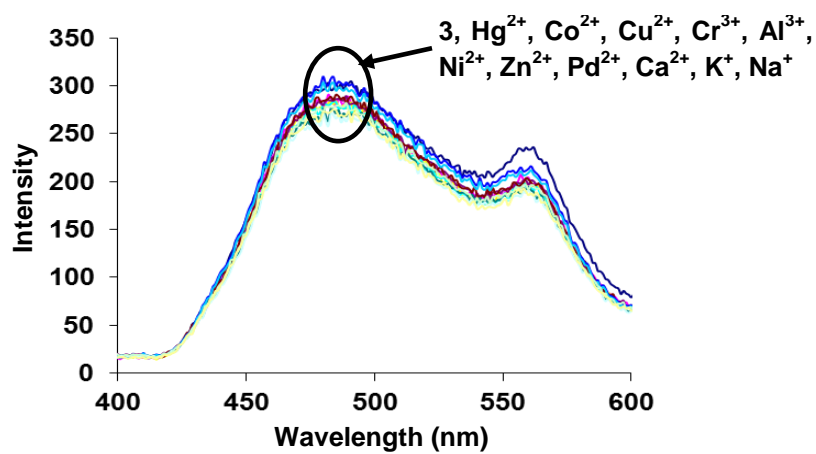

**Fig. S12** Fluorescence spectra of derivative **3** (10 μM) upon additions of various metal ions (500 μM) as their chloride salt in H<sub>2</sub>O/THF (6/4) buffered with HEPES, pH = 7.0.

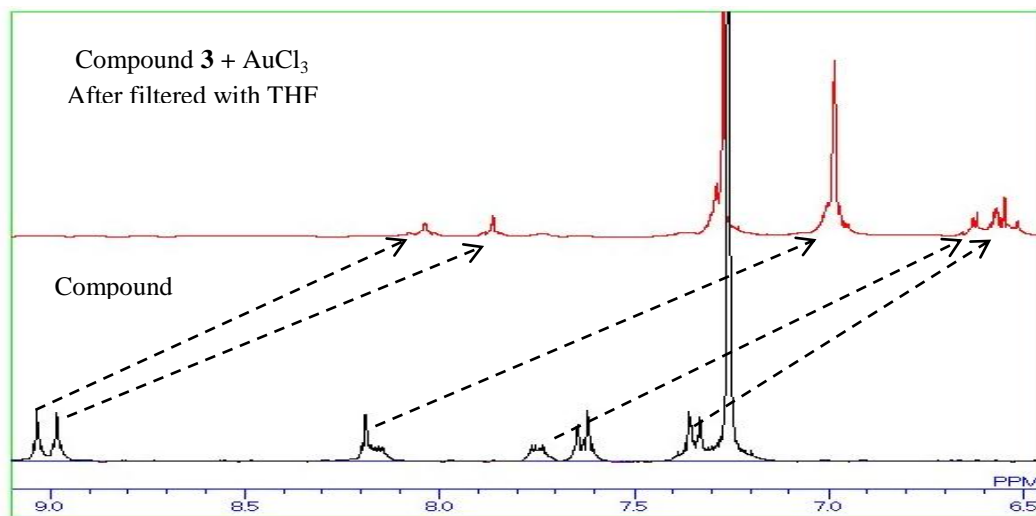

**Fig. S13:** Overlay <sup>1</sup>H NMR spectra of derivative 3 and gold nanoparticles of derivative 3 after filtration with THF.



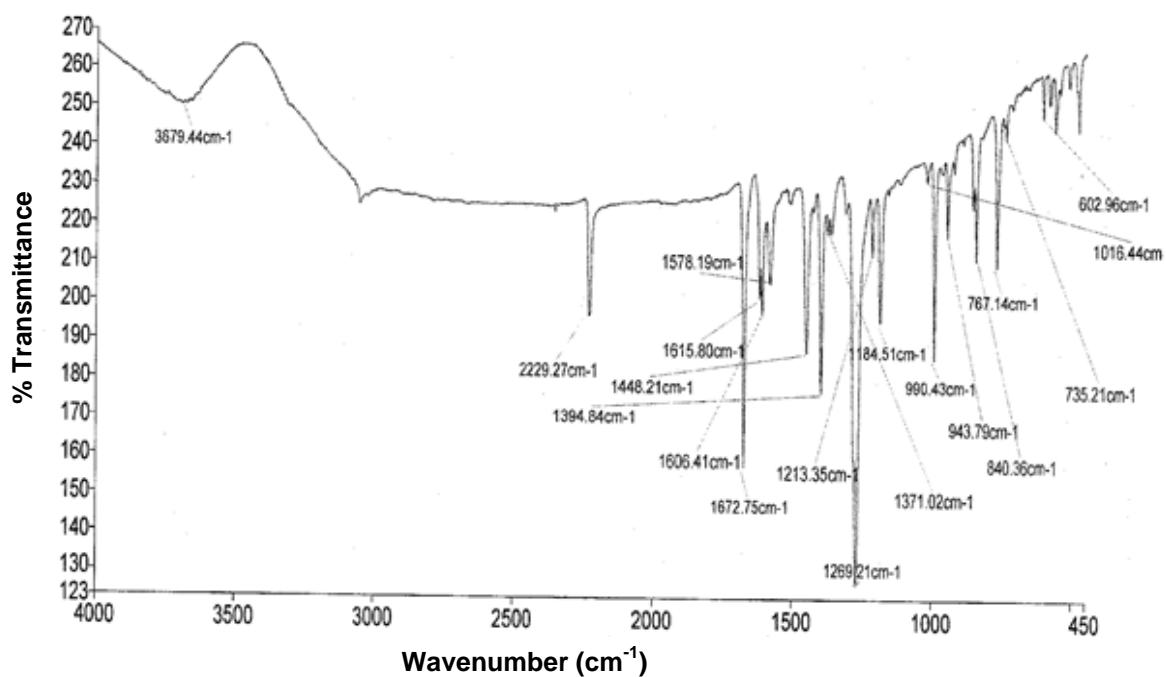

**Fig. S14** Fourier transforms infrared absorption spectra of derivative **3**.

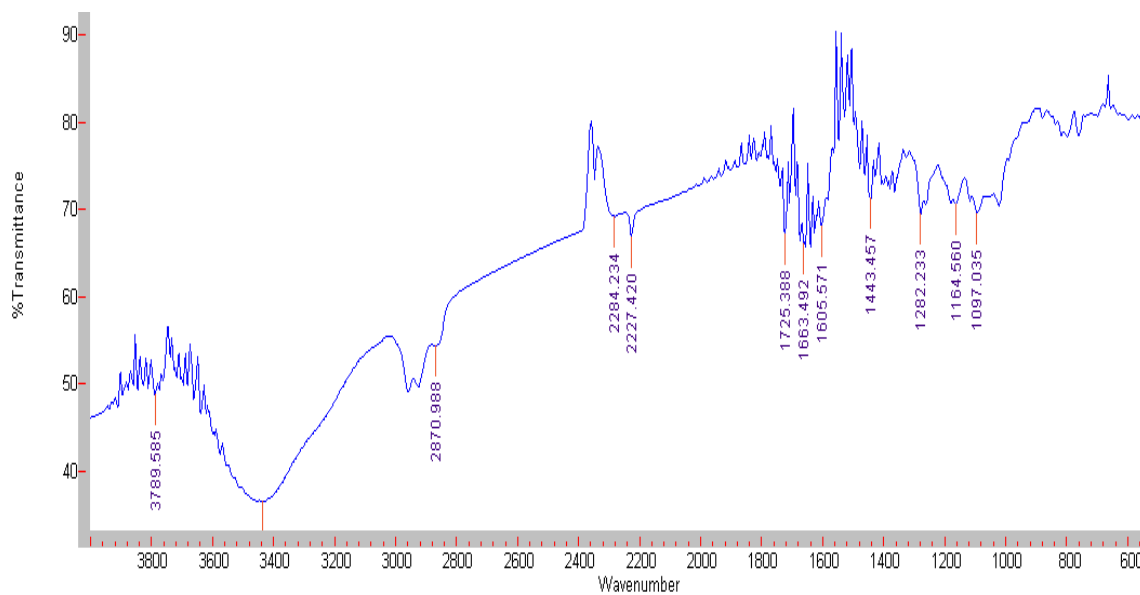

**Fig. S15** Fourier transforms infrared absorption spectra of gold nanoparticles of derivative **3** after filtration with THF.

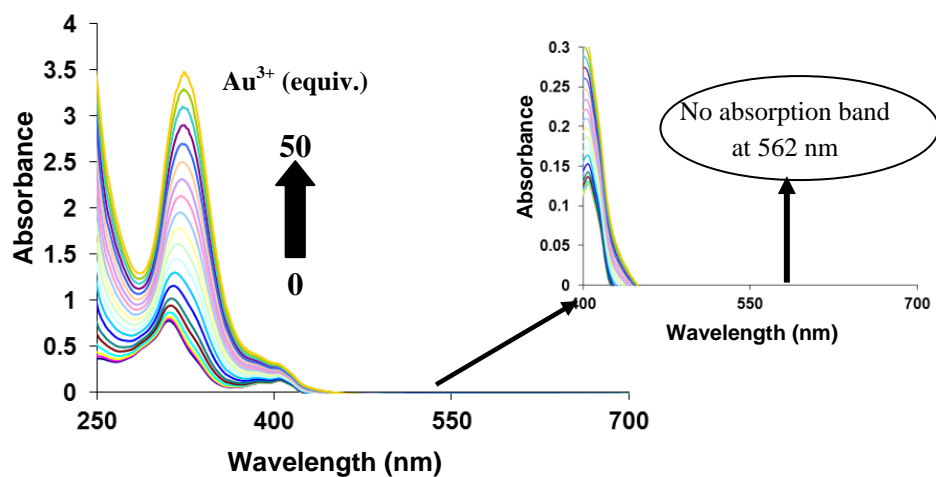

**Fig. S16** UV-vis spectra of derivative **3** (10 μM) upon various additions of Au<sup>3+</sup> ions in THF. Inset: enlarge UV spectra of compound **3** (10 μM) in the range of 400-700 nm.

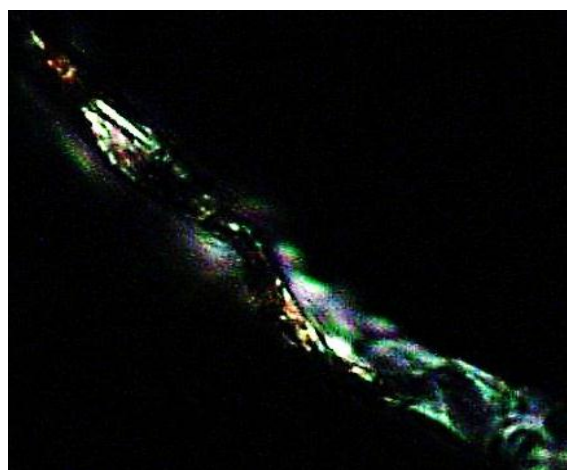

**Fig. S17** Polarized optical micrograph of gold nanoparticles of derivative **3** at room temperature through crossed polarizing filters.

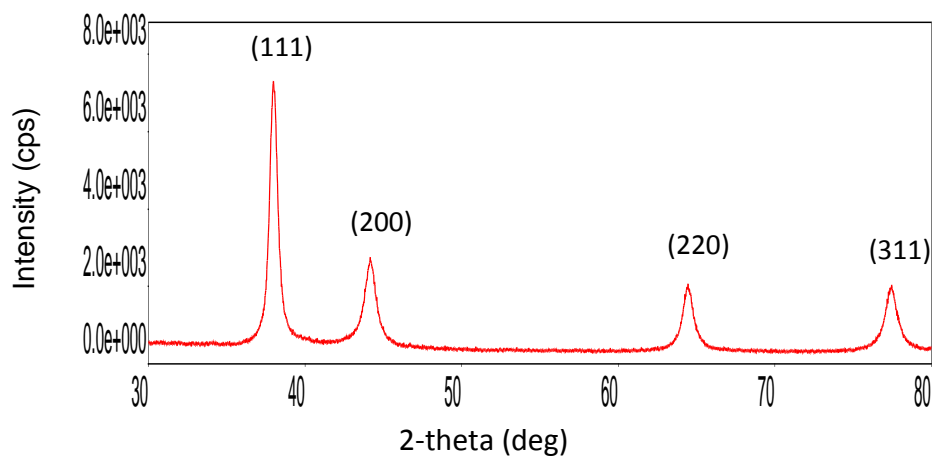

**Fig. S18** Representative XRD diffraction patterns of gold nanoparticles of derivative **3**.

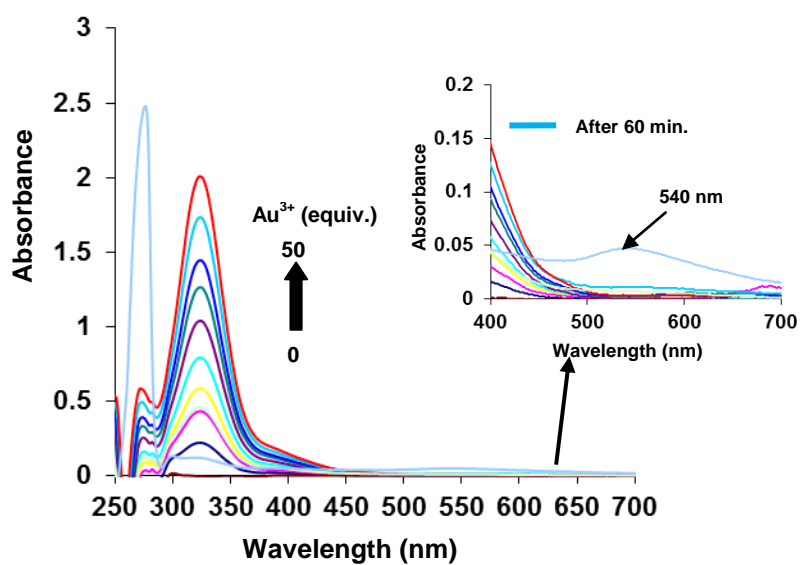

**Fig. S19** UV-vis spectra of 4-Bromobenzonitrile (10  $\mu\text{M}$ ) upon various additions of  $\text{Au}^{3+}$  ions in  $\text{H}_2\text{O}/\text{THF}$  (6/4). Inset: enlarge UV spectra of 4-Bromobenzonitrile (10  $\mu\text{M}$ ) in the range of 400-700 nm.

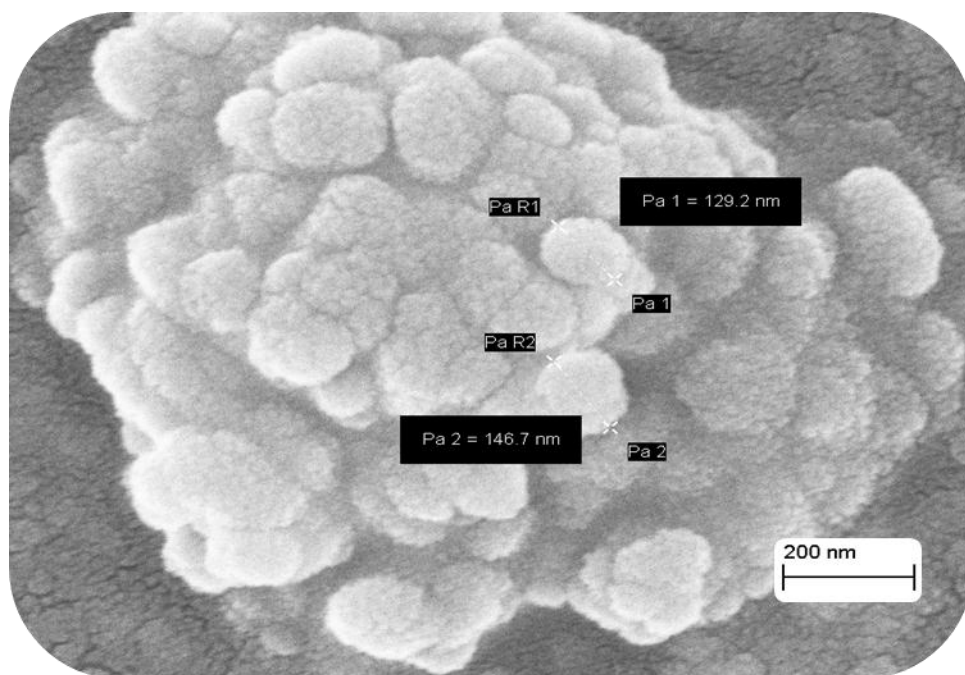

**Fig. S20** SEM image of gold nanoparticles of 4-Bromobenzonitrile showing size of gold nanoparticles. Scale bar 200 nm.

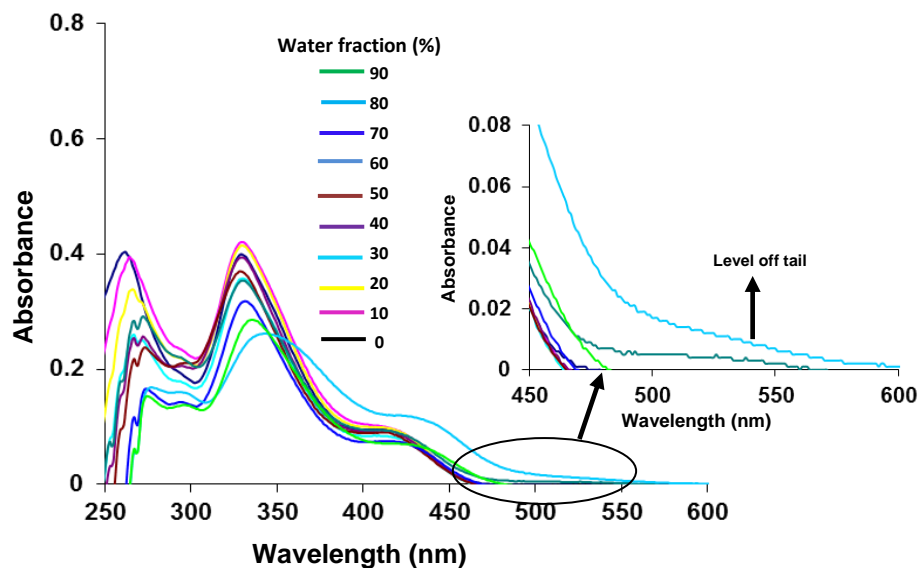

**Fig. S21** Absorption spectrum of derivative **4** (10 μM) showing the variation of absorption intensity in H<sub>2</sub>O/THF mixture with different fractions of water. Inset: enlarge UV-vis spectra of derivative **4** (10 μM) with the addition of H<sub>2</sub>O/THF mixture in the range of 450-600 nm showing level-off long wavelength tail.

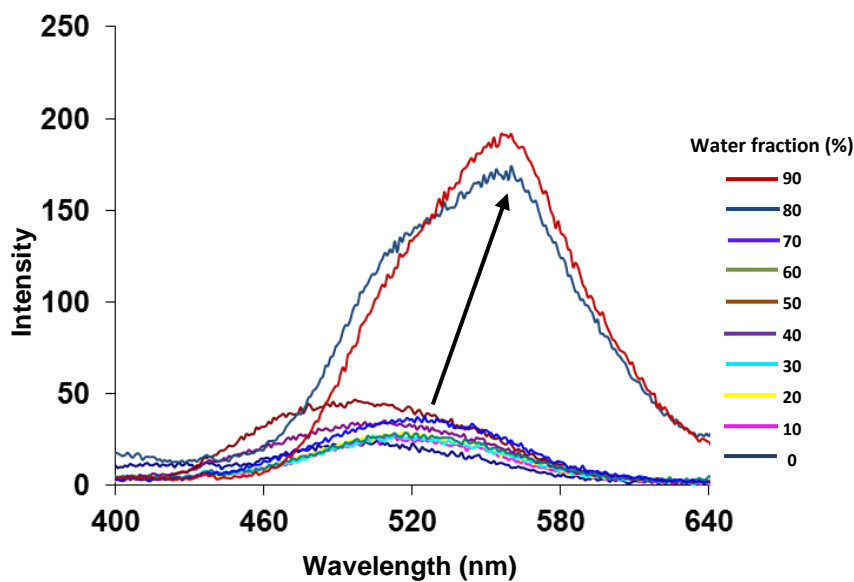

**Fig. S22** Fluorescence spectrum of derivative **4** (10 μM) showing the variation of fluorescence intensity in H<sub>2</sub>O/THF mixture from 0 to 90% volume fractions of water in THF.  $\lambda_{\text{ex}} = 327 \text{ nm}$ .

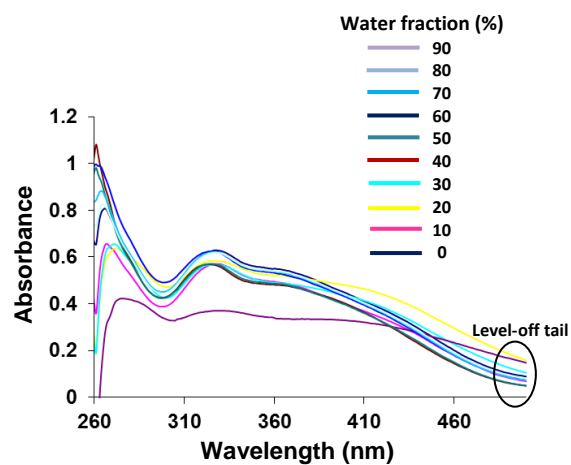

**Fig. S23** Absorption spectrum of derivative **6** (10 μM) showing the variation of absorption intensity in H<sub>2</sub>O/THF mixture with different fractions of water.

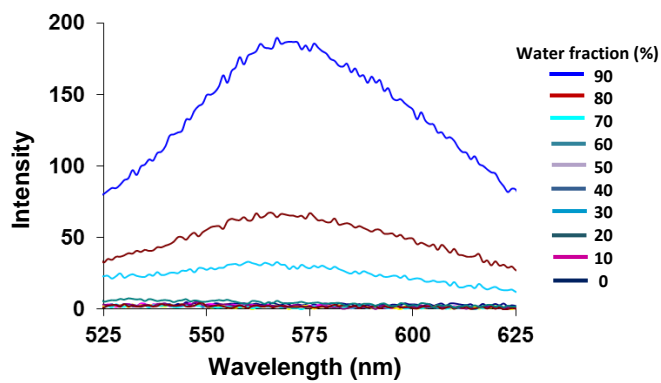

**Fig. S24** Fluorescence spectrum of derivative **6** (1x10<sup>-4</sup> M) showing the variation of fluorescence intensity in various H<sub>2</sub>O/THF mixtures.  $\lambda_{\text{ex}} = 322$  nm.

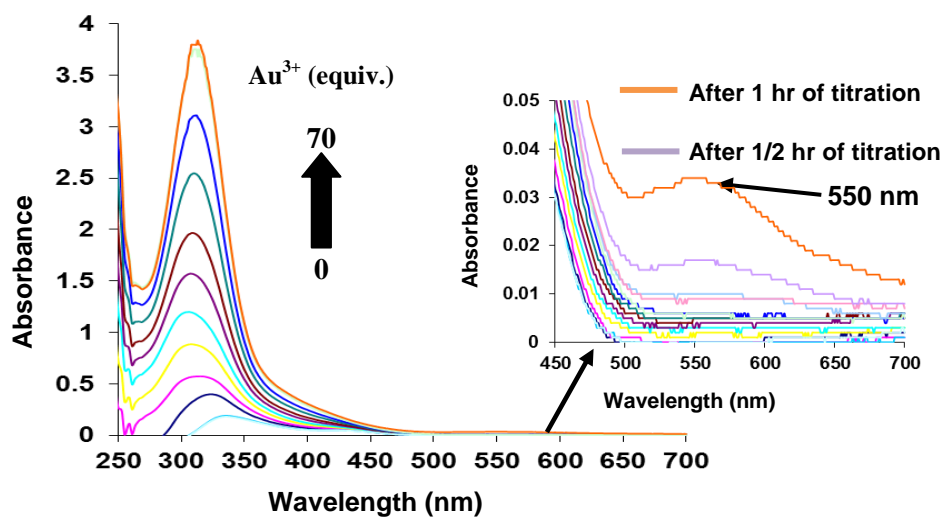

**Fig. S25** UV-vis spectrum of derivative **4** (10 μM) upon various additions of Au<sup>3+</sup> ions in H<sub>2</sub>O/THF (9/1). Inset: enlarge UV spectrum of compound **4** (10 μM) in the range of 450-700 nm showing a new absorption band at 550 nm.

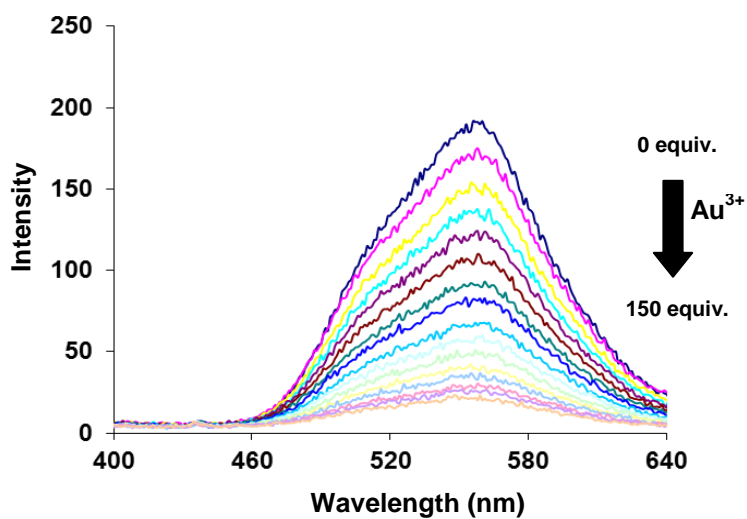

**Fig. S26** Fluorescence spectrum of derivative **4** (10 μM) upon addition of Au<sup>3+</sup> ions in H<sub>2</sub>O/THF (9/1); buffered with HEPES, pH = 7.0

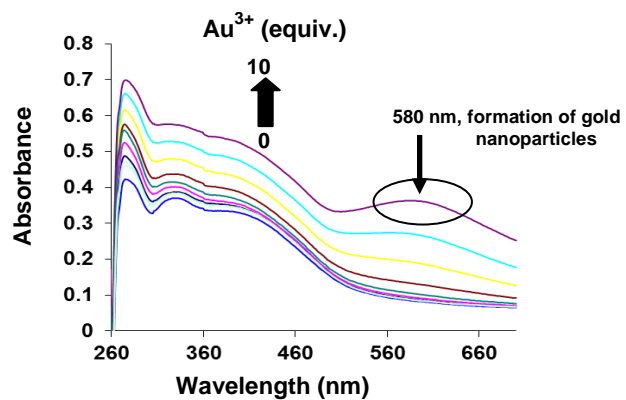

**Fig. S27.** UV-vis spectrum of derivative **6** ( $10\ \mu\text{M}$ ) upon addition of  $\text{Au}^{3+}$  ions (10 equiv.) in  $\text{H}_2\text{O}/\text{THF}$  (9:1) mixture; buffered with HEPES,  $\text{pH} = 7.0$ .

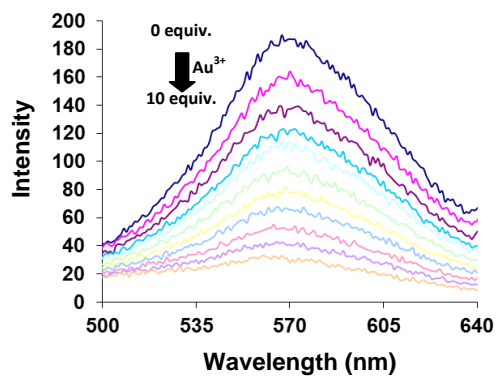

**Fig. S28** Fluorescence spectrum of derivative **6** ( $1 \times 10^{-4}\ \mu\text{M}$ ) upon addition of  $\text{Au}^{3+}$  ions in  $\text{H}_2\text{O}/\text{THF}$  (9:1); buffered with HEPES,  $\text{pH} = 7.0$ .  $\lambda_{\text{ex}} = 322\ \text{nm}$



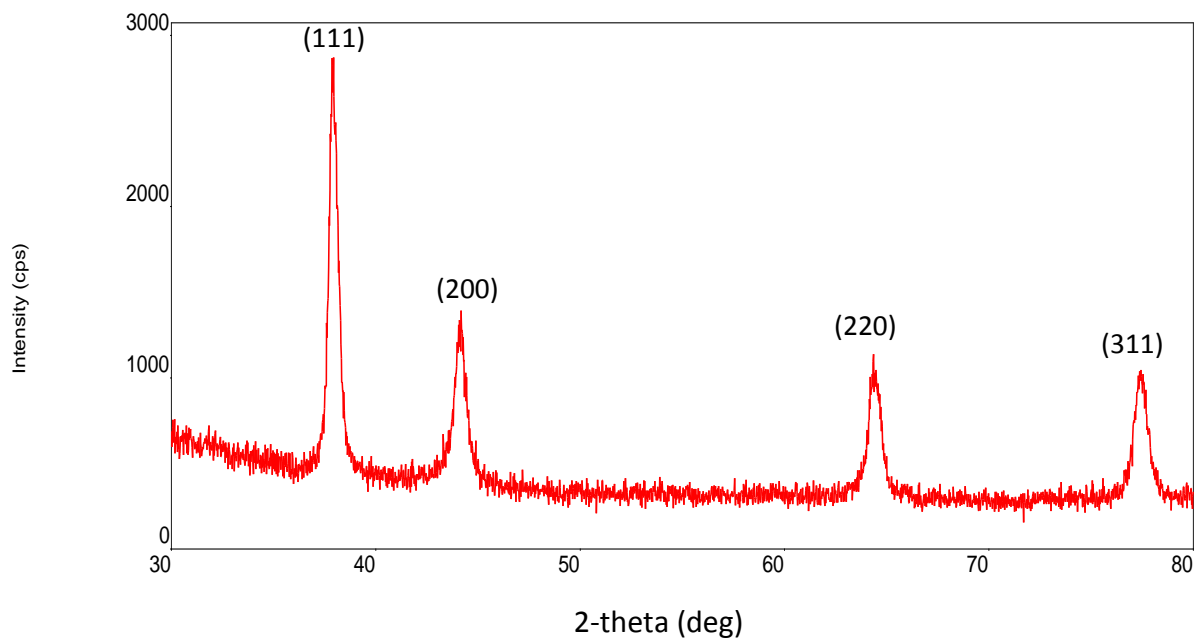

**Fig. S29** Representative XRD diffraction patterns of gold nanoparticles of derivative 4.

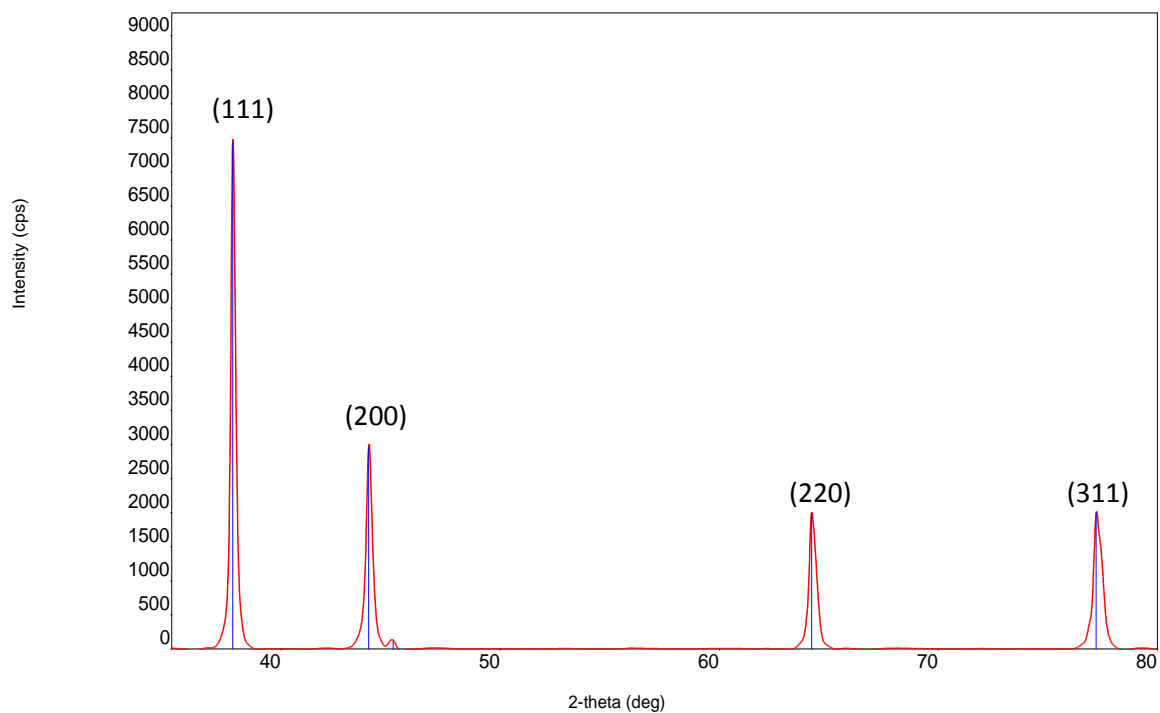

**Fig. S30** Representative XRD diffraction patterns of gold nanoparticles of derivative 6.

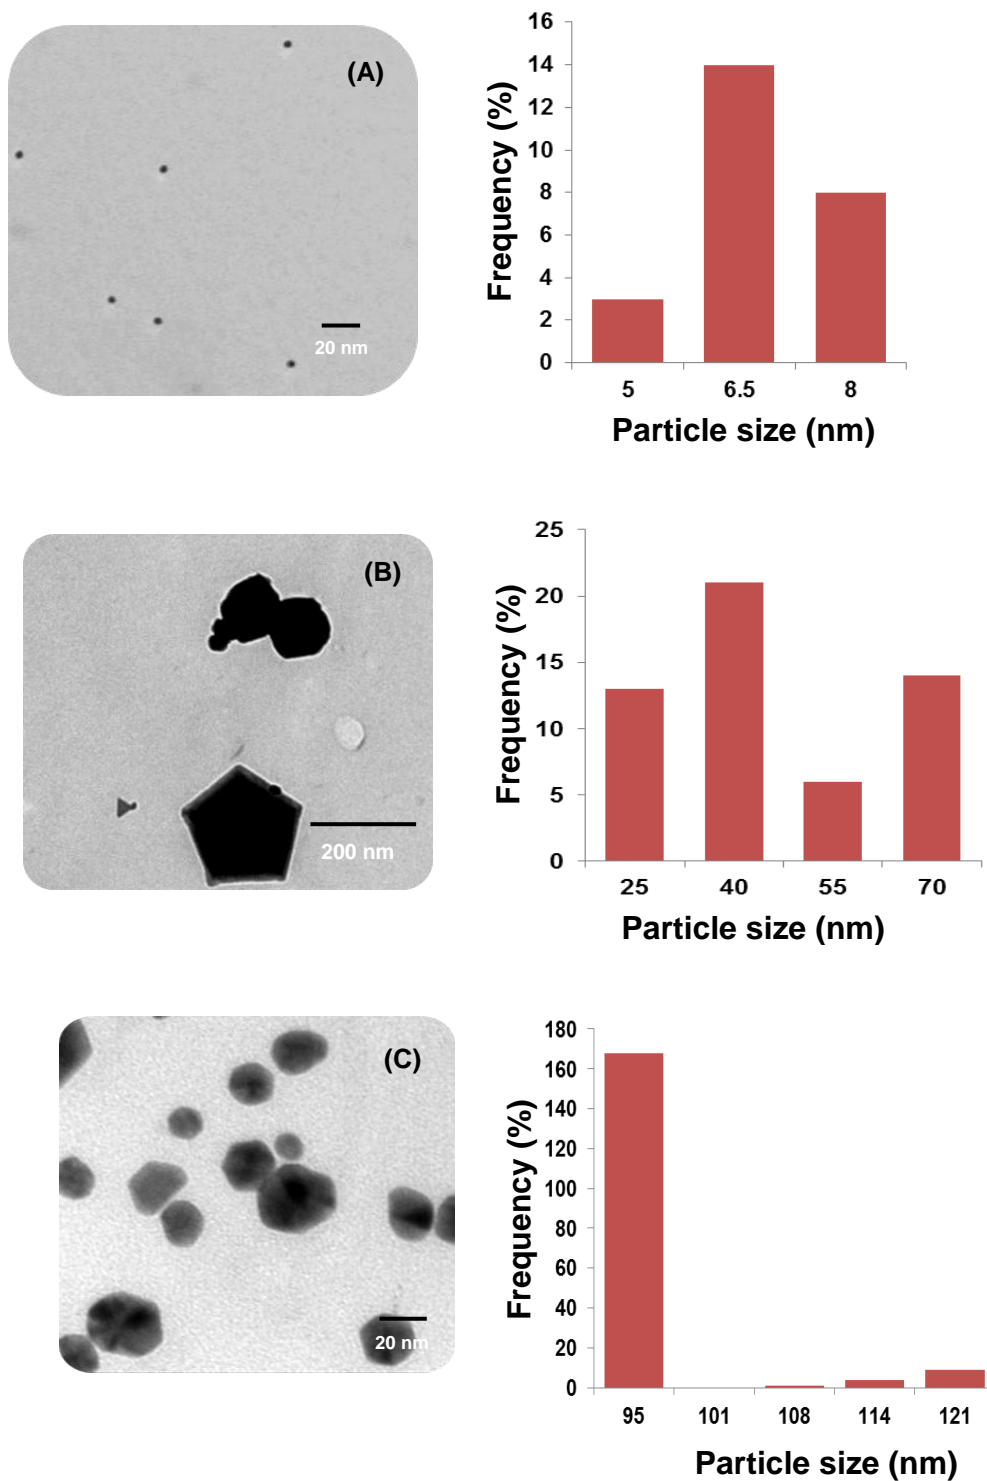

**Fig. S31** Transmission electron microscope (TEM) images and size distribution of gold nanoparticles of (A) derivative **3** (B) derivative **4** (C) derivative **6**. Scale bar (A) 20 nm (B) 200 nm (C) 20 nm.

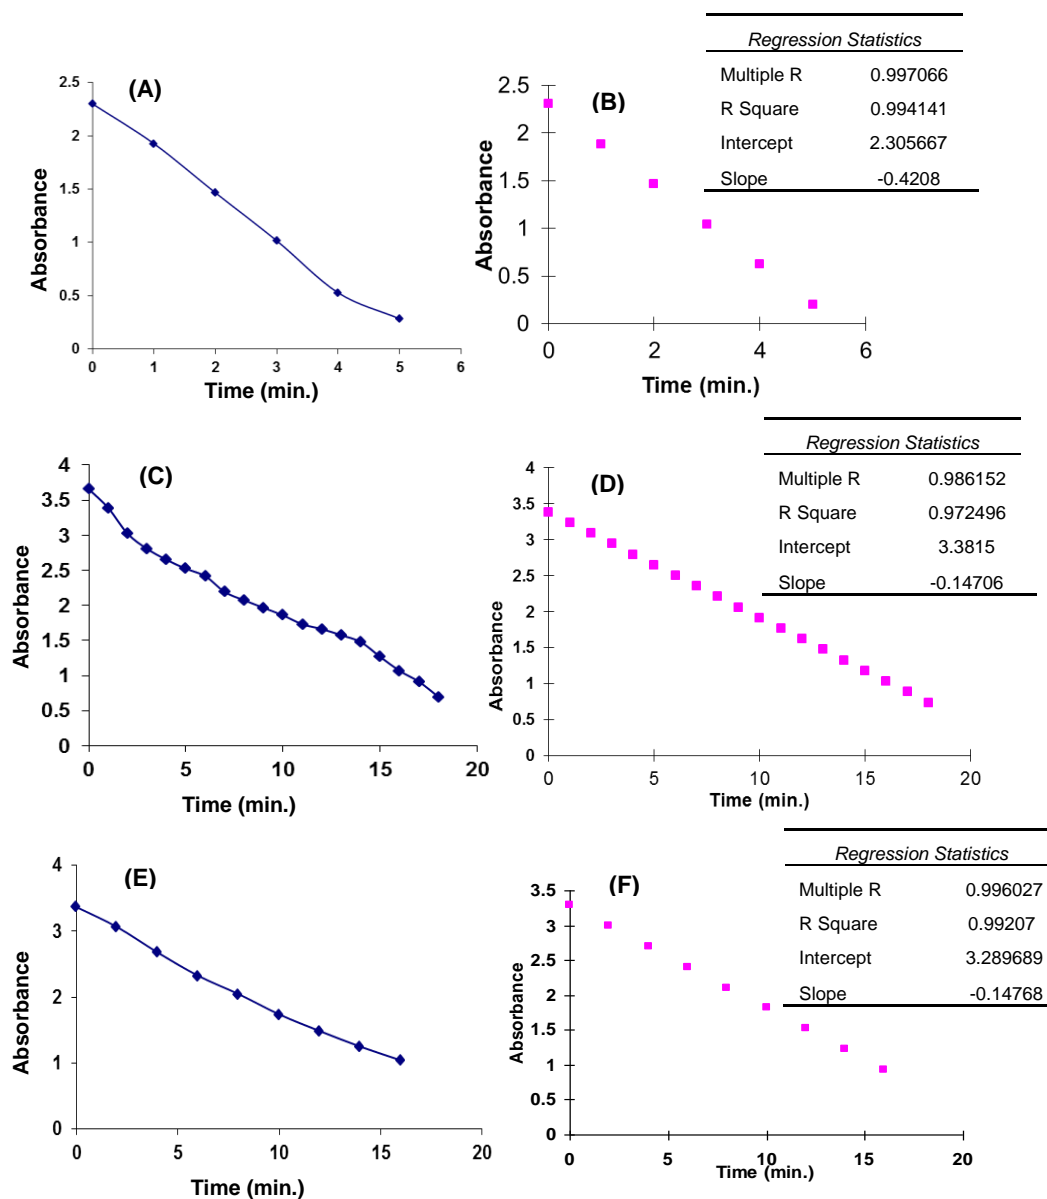

**Fig. S32** Graphical representation of Time vs. absorbance plot and regression plot for the reduction of *p*-nitroaniline catalyzed by gold nanoparticles (A) and (B) of derivative **3** (C) and (D) of derivative **4** (E) and (F) of derivative **6**.

Catalytic reduction of *p*-nitroaniline follows Pseudo-first-order kinetics.<sup>3</sup> The apparent rate constants for the degradation of *p*-nitroaniline by gold nanoparticles of derivatives **3**, **4** and **6** listed in following table:

| Gold nanoparticles  | Rate constant                          |
|---------------------|----------------------------------------|
| Derivative <b>3</b> | $1.62 \times 10^{-2} \text{ sec}^{-1}$ |
| Derivative <b>4</b> | $5.64 \times 10^{-3} \text{ sec}^{-1}$ |
| Derivative <b>6</b> | $5.67 \times 10^{-3} \text{ sec}^{-1}$ |

(3) Zelentsov, S. V.; Simdyanov, I. V.; Kuznetsov, M. V. *High Energy Chemistry* **2005**, *39*, 309-312.

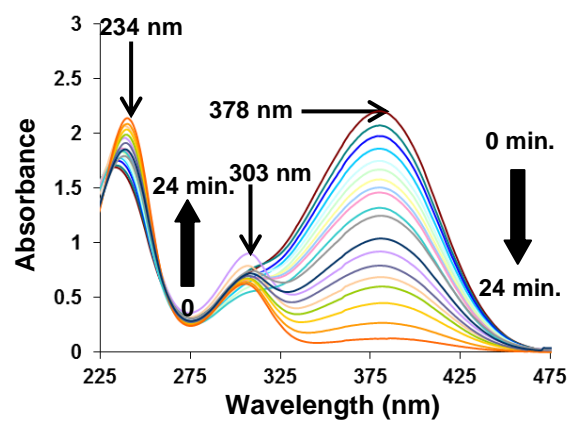

**Fig. S33** UV-vis spectrum for the reduction of *p*-nitroaniline by adding  $\text{NaBH}_4$  aqueous solution using gold nanoparticles of derivative **4** as catalysts.

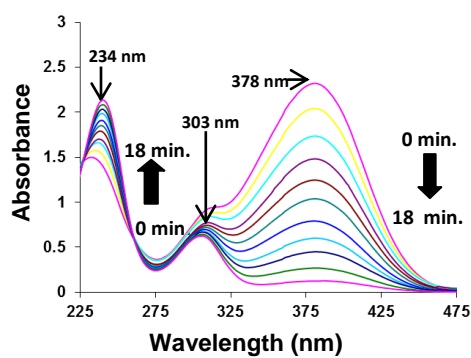

**Fig. S34** UV-vis spectrum for the reduction of *p*-nitroaniline by adding  $\text{NaBH}_4$  aqueous solution using gold nanoparticles of derivative **6** as catalysts.

$^1\text{H}$  NMR of compound of *p*-phenylenediamine in  $\text{CDCl}_3$

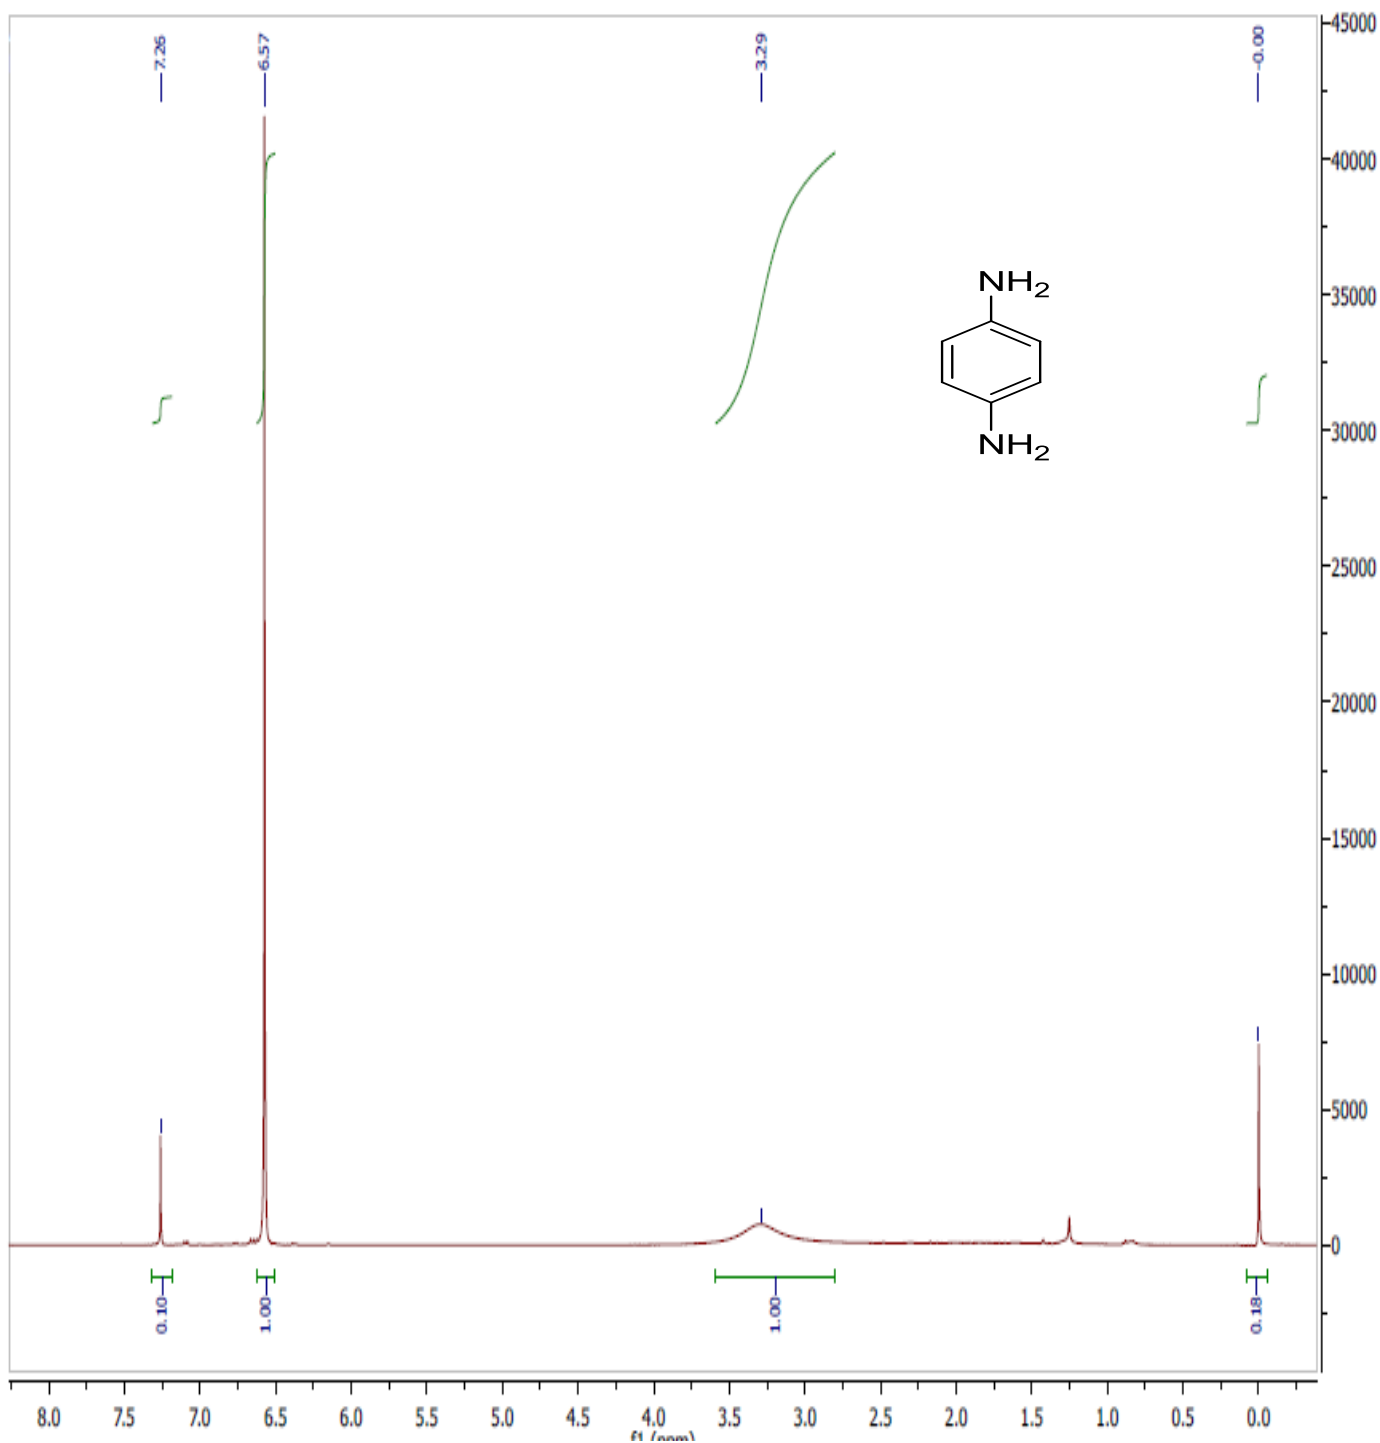

Fig. S35  $^1\text{H}$  NMR spectra of the reduced product *p*-Phenylenediamine in  $\text{CDCl}_3$ .

$^1\text{H}$  NMR of compound **3** in  $\text{CDCl}_3$

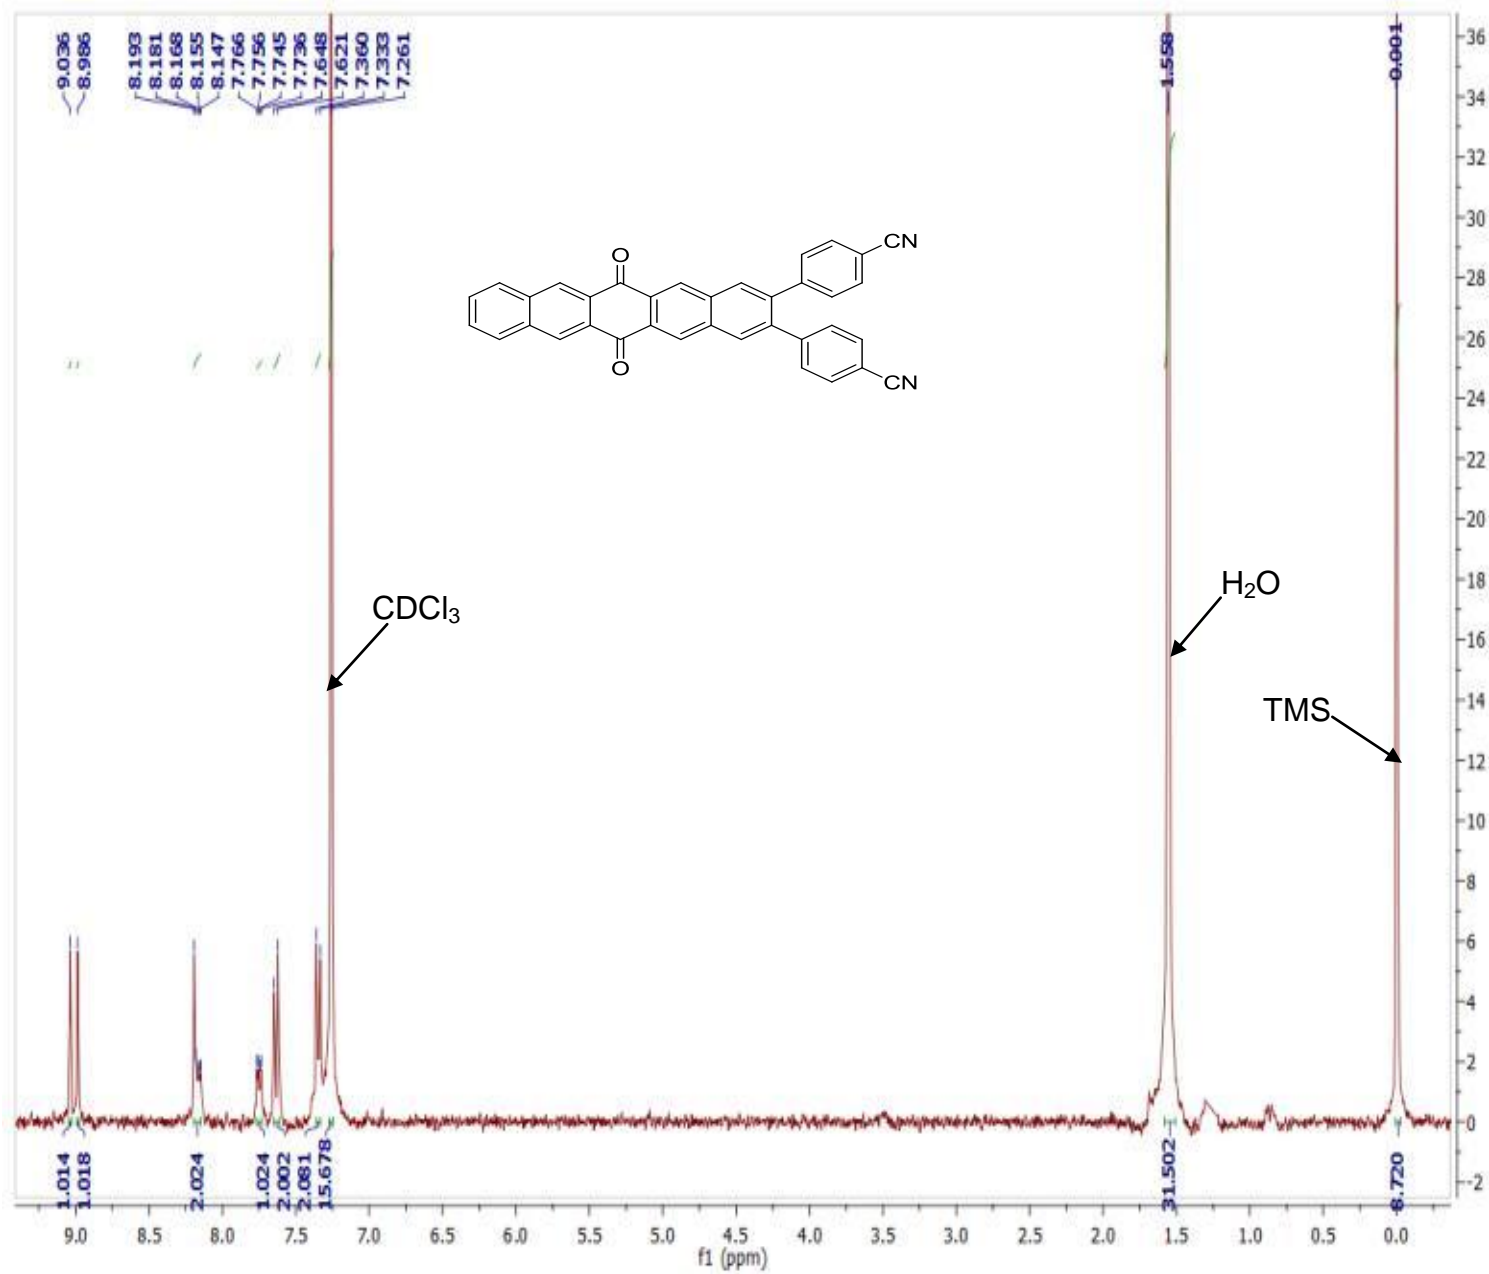

Fig. S36  $^1\text{H}$  NMR of spectrum of compound **3** in  $\text{CDCl}_3$ .

### Mass spectrum of compound 3

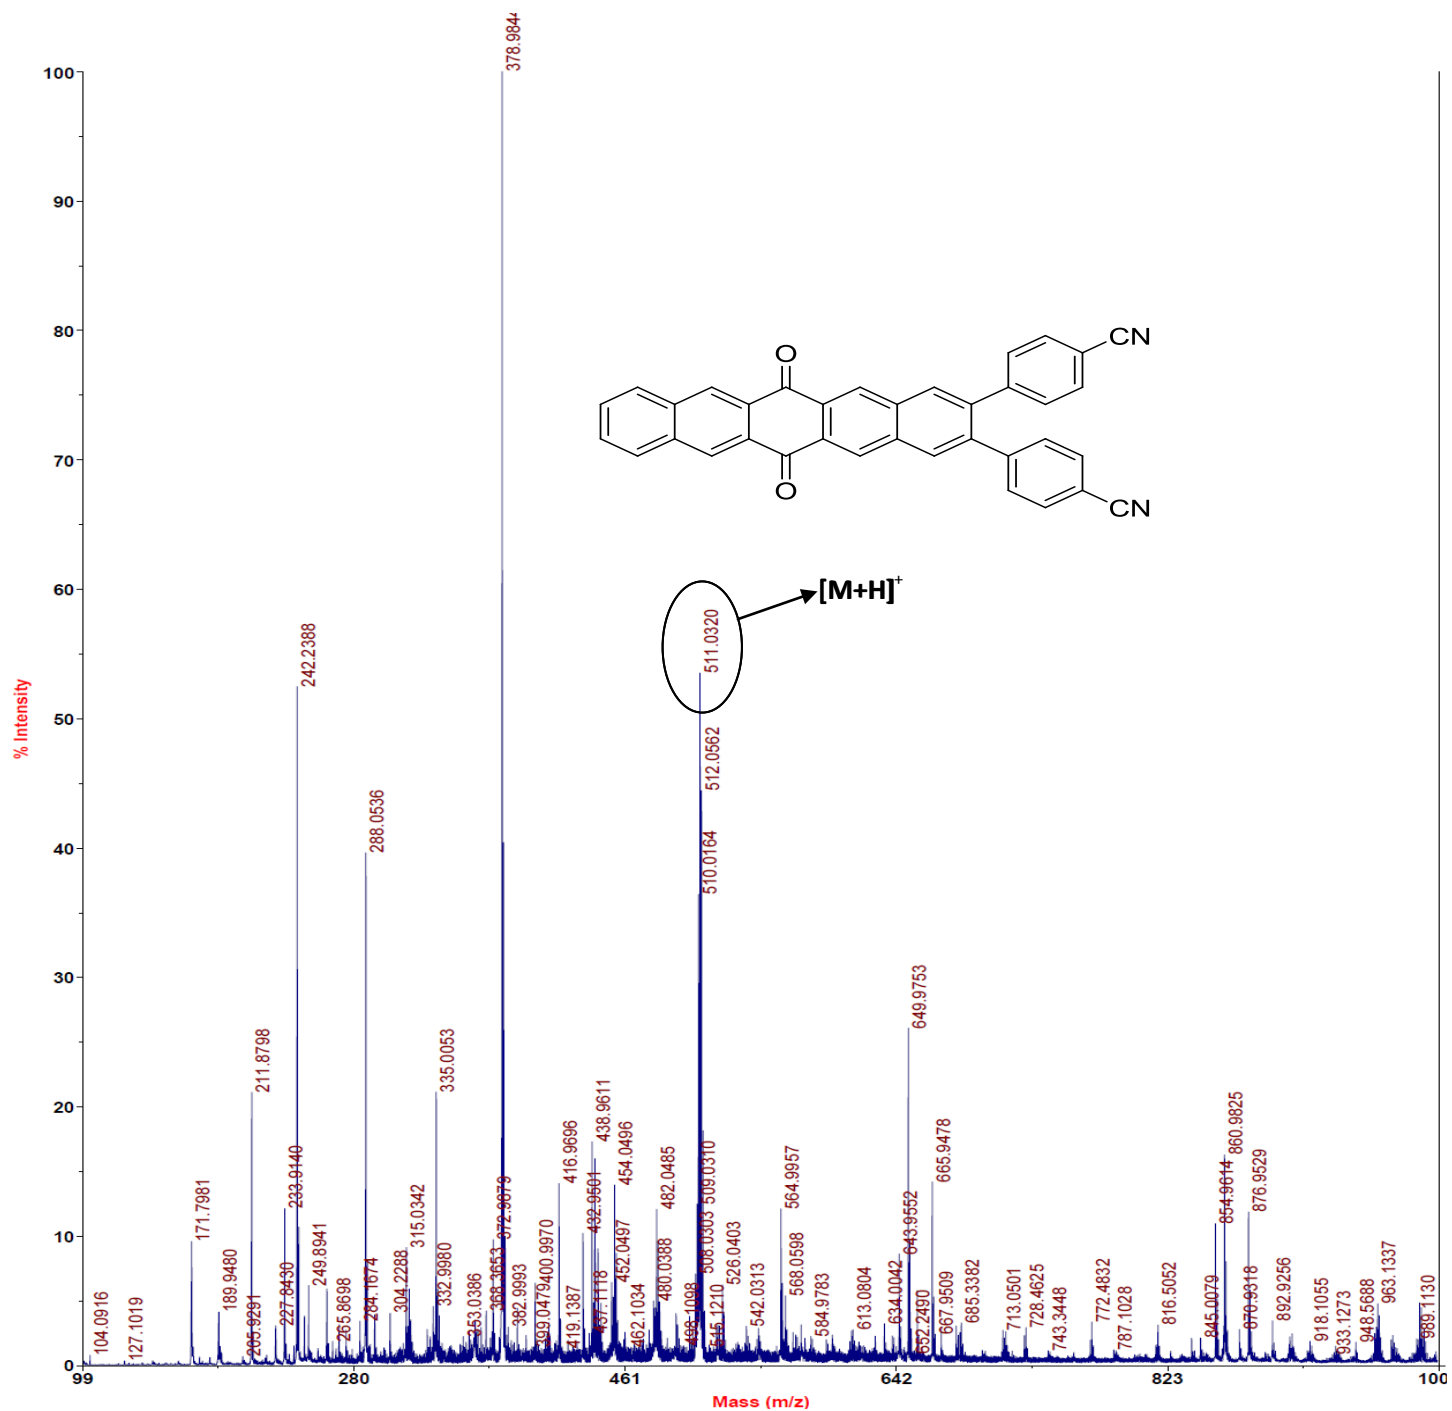

Fig. S37 Mass spectrum of compound 3.

$^1\text{H}$  NMR of compound **4** in  $\text{CDCl}_3$

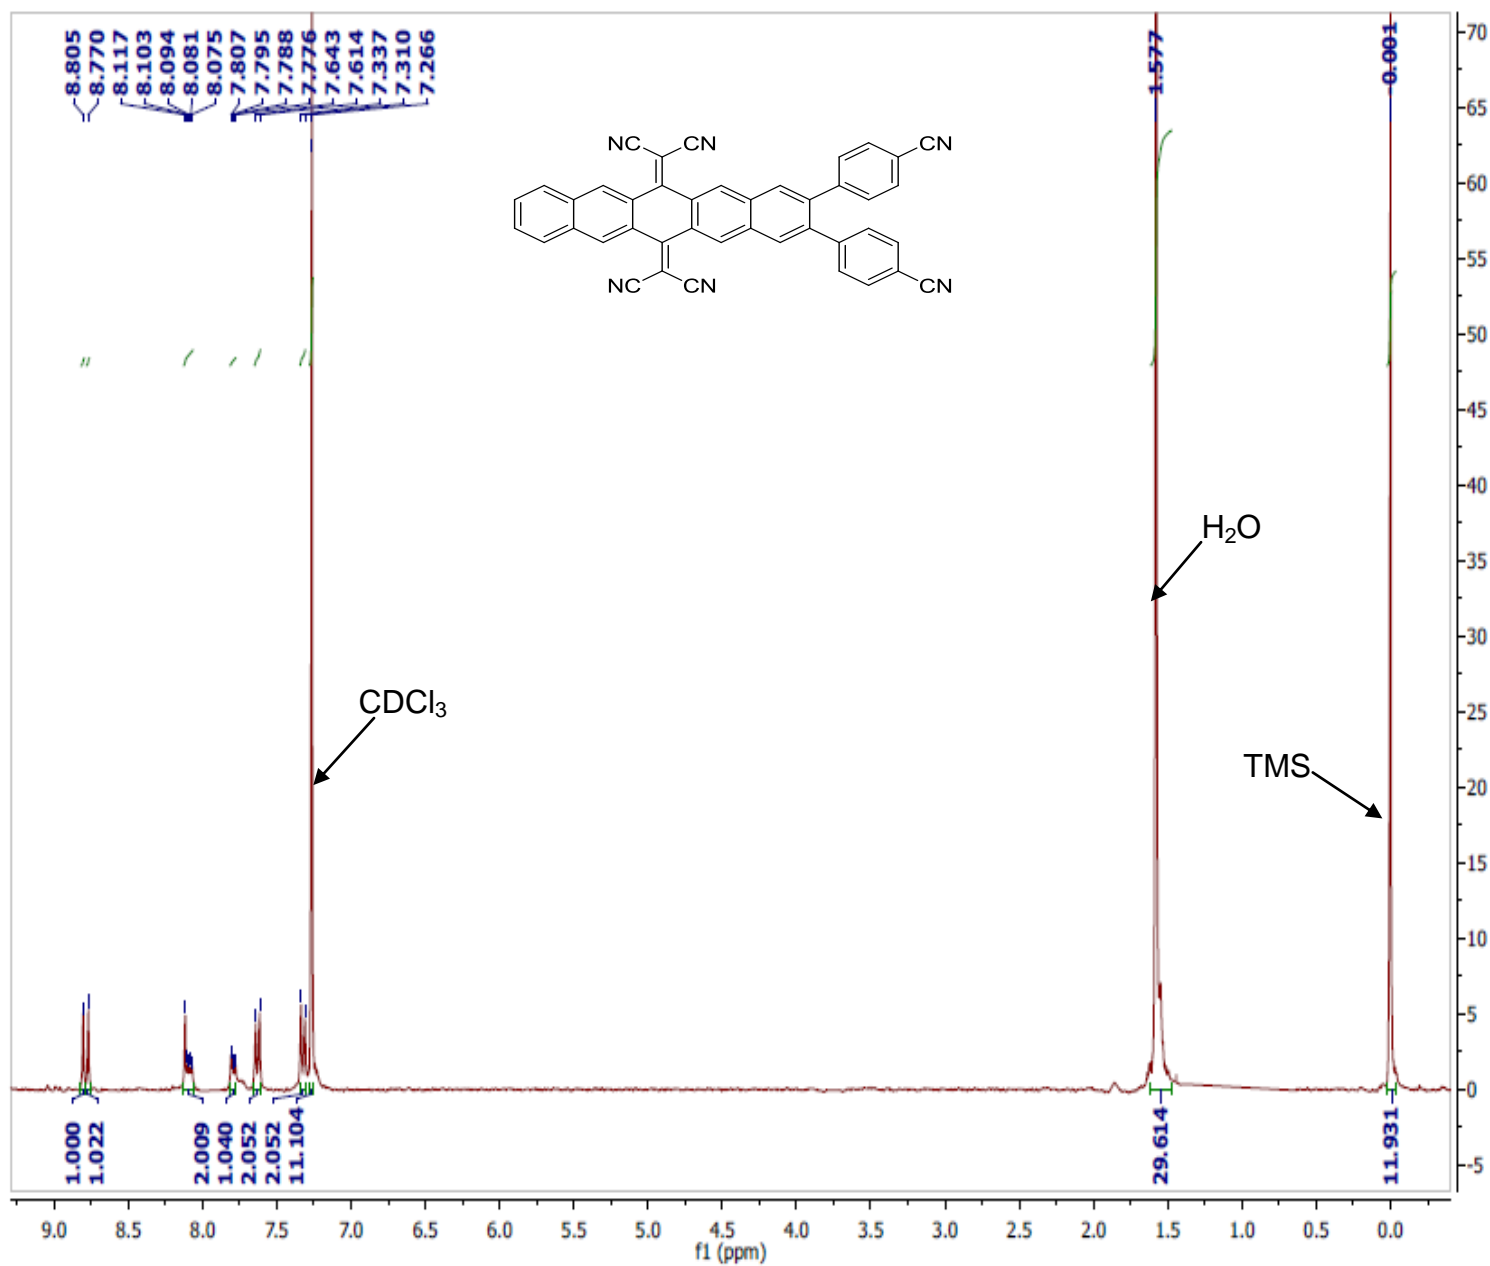

Fig. S38  $^1\text{H}$  NMR spectrum of compound **4** in  $\text{CDCl}_3$ .



$^{13}\text{C}$  NMR of compound **4** in  $\text{CDCl}_3$

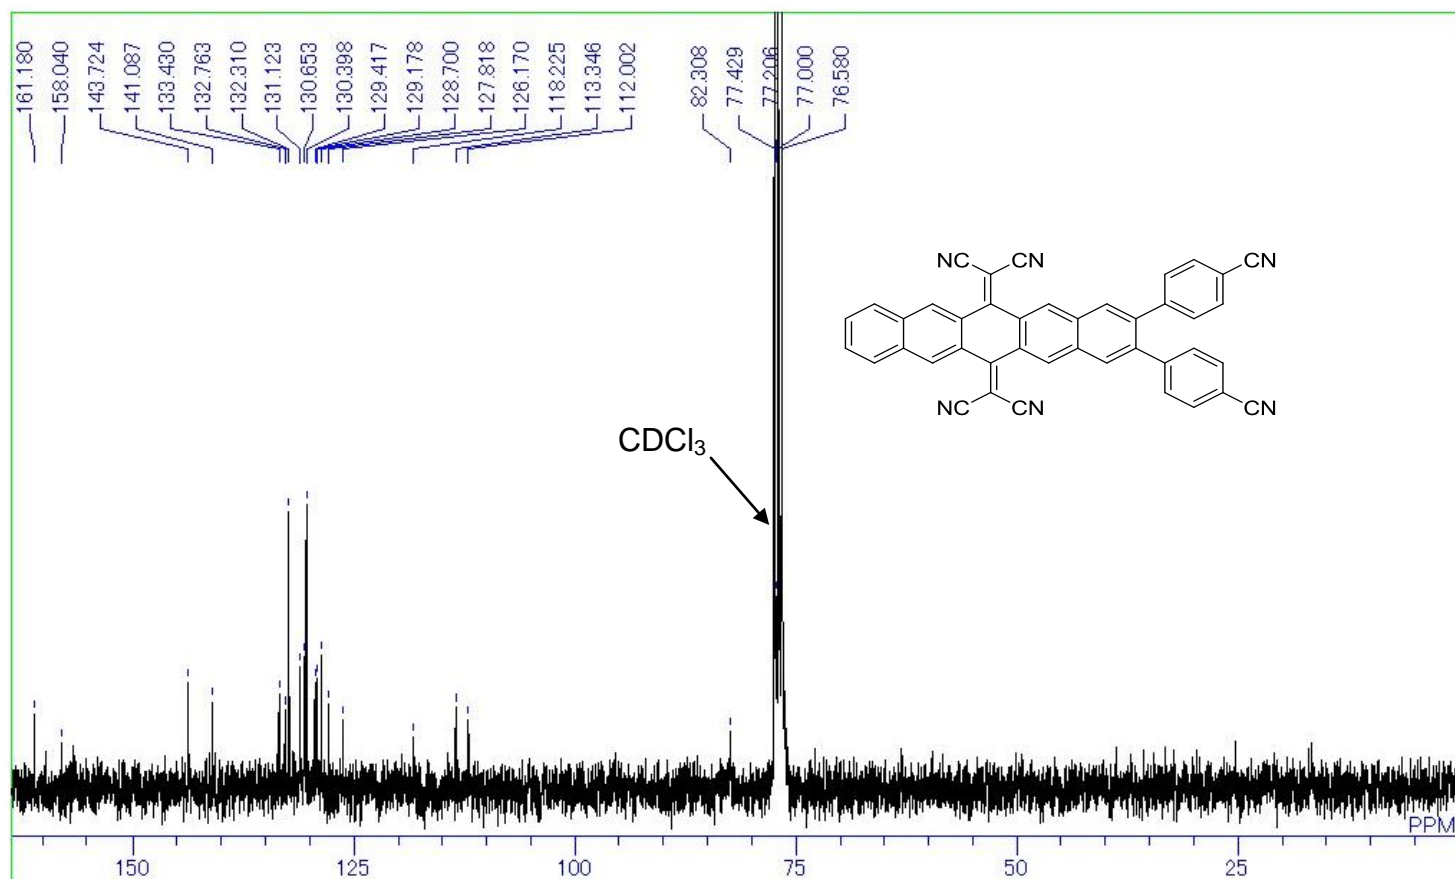

Fig. S39  $^{13}\text{C}$  NMR spectrum of compound **4** in  $\text{CDCl}_3$ .

Mass spectrum of compound 4

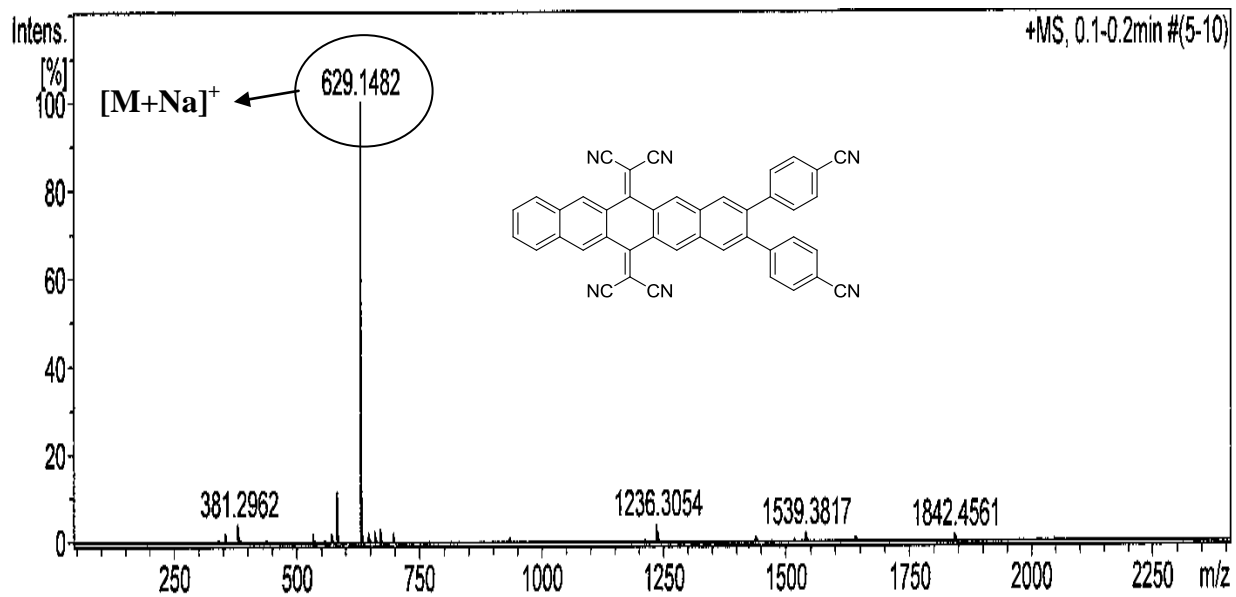

Fig. S40 Mass spectrum of compound 4.

<sup>1</sup>H NMR spectrum of compound **5**

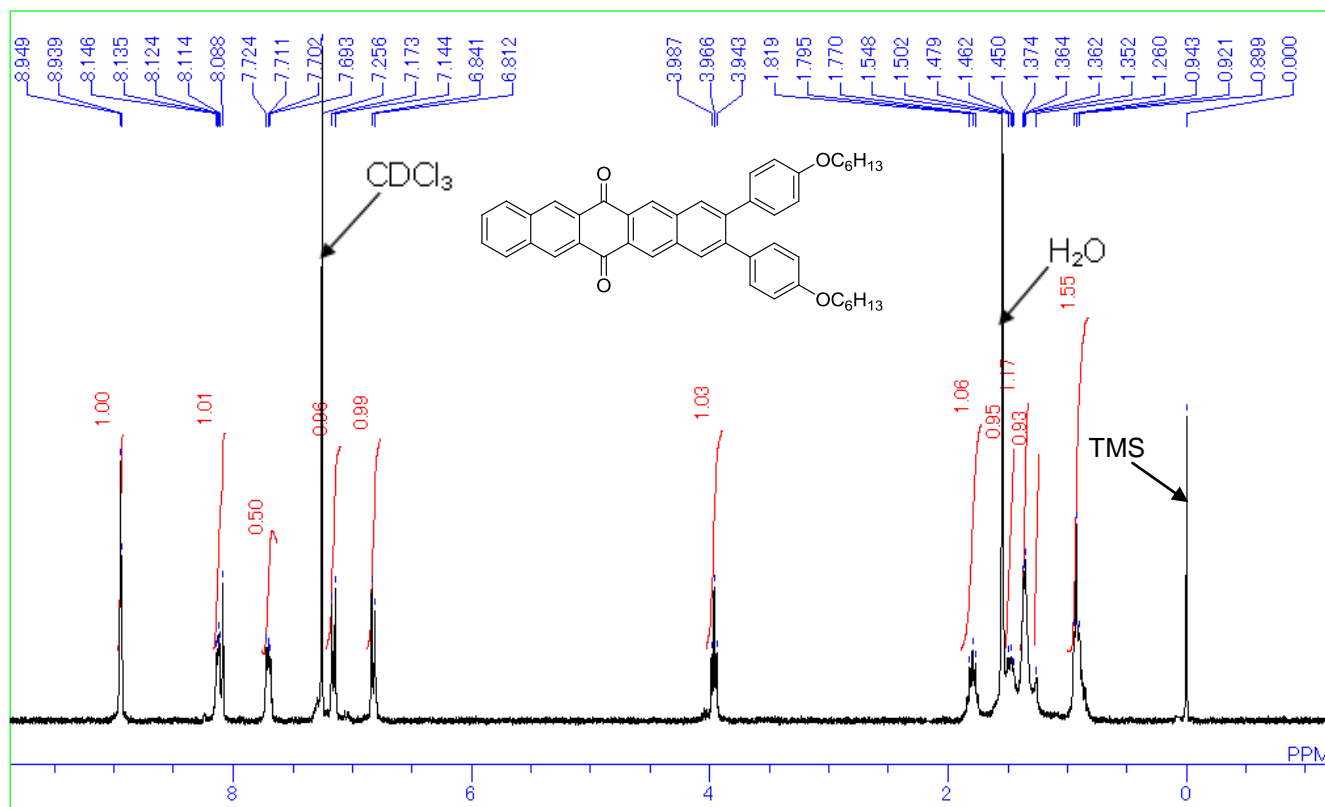

Fig. S41 <sup>1</sup>H NMR spectrum of compound **5** in CDCl<sub>3</sub>

<sup>13</sup>C NMR spectrum of compound **5**

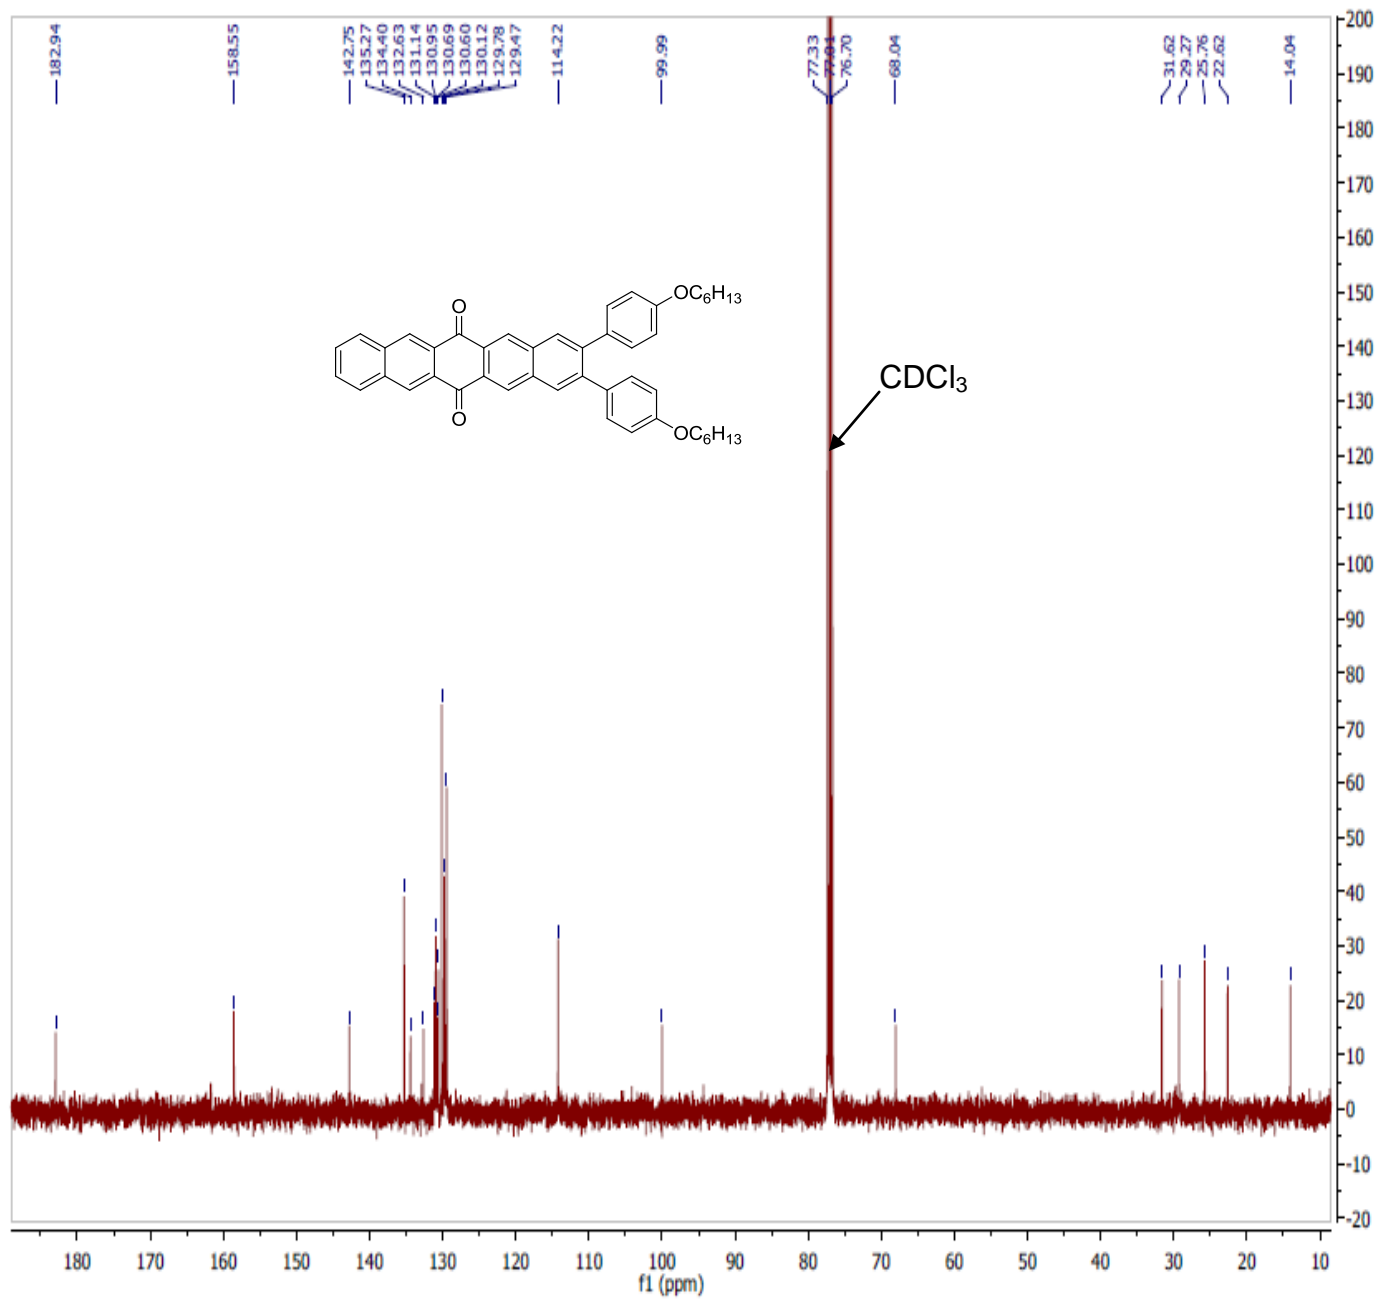

Fig S42 <sup>13</sup>C NMR spectrum of compound **5** in CDCl<sub>3</sub>.

Mass spectrum of compound 5

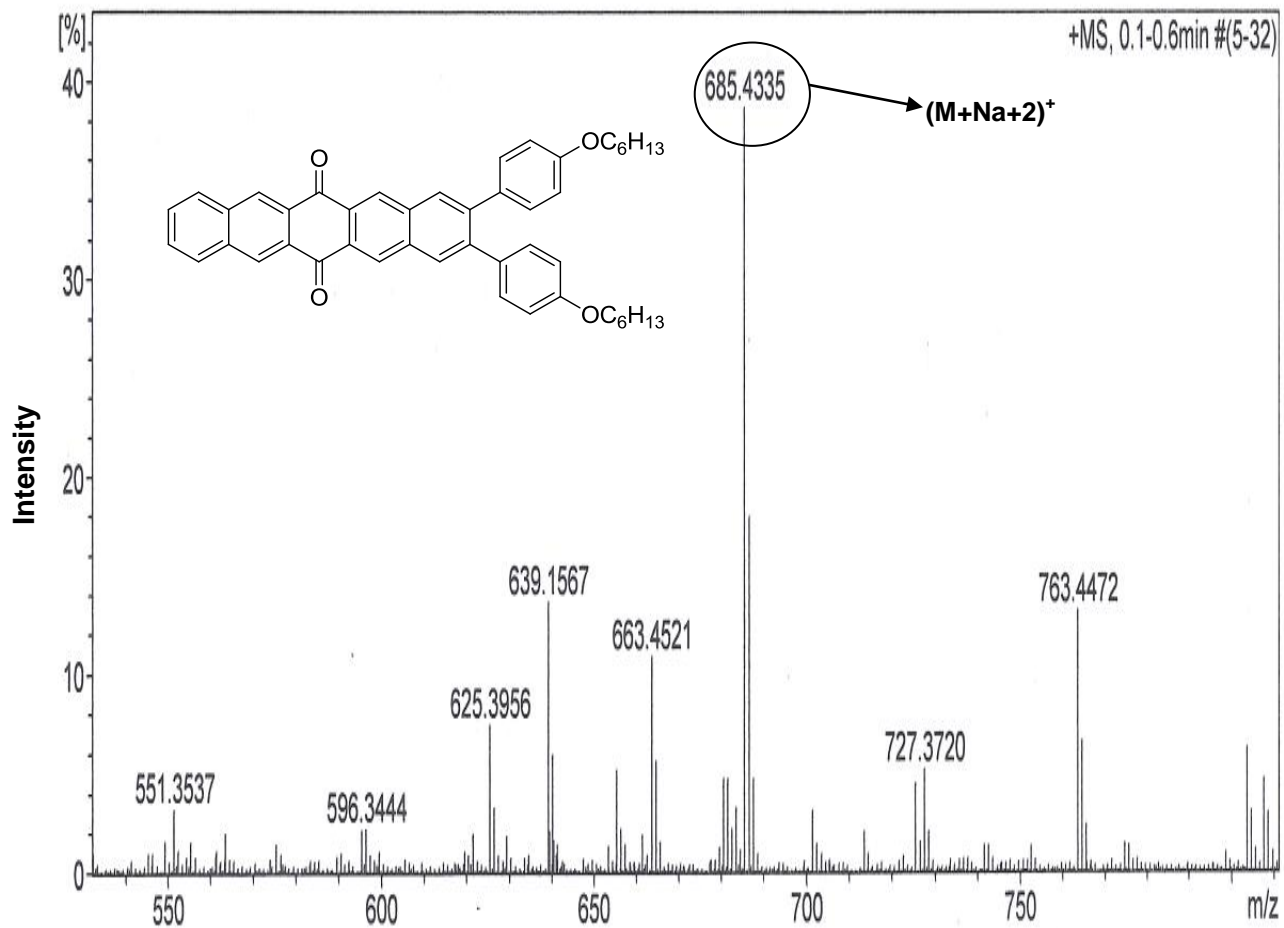

Fig. S43 Mass spectrum of compound 5

<sup>1</sup>H NMR spectrum of compound **6**.

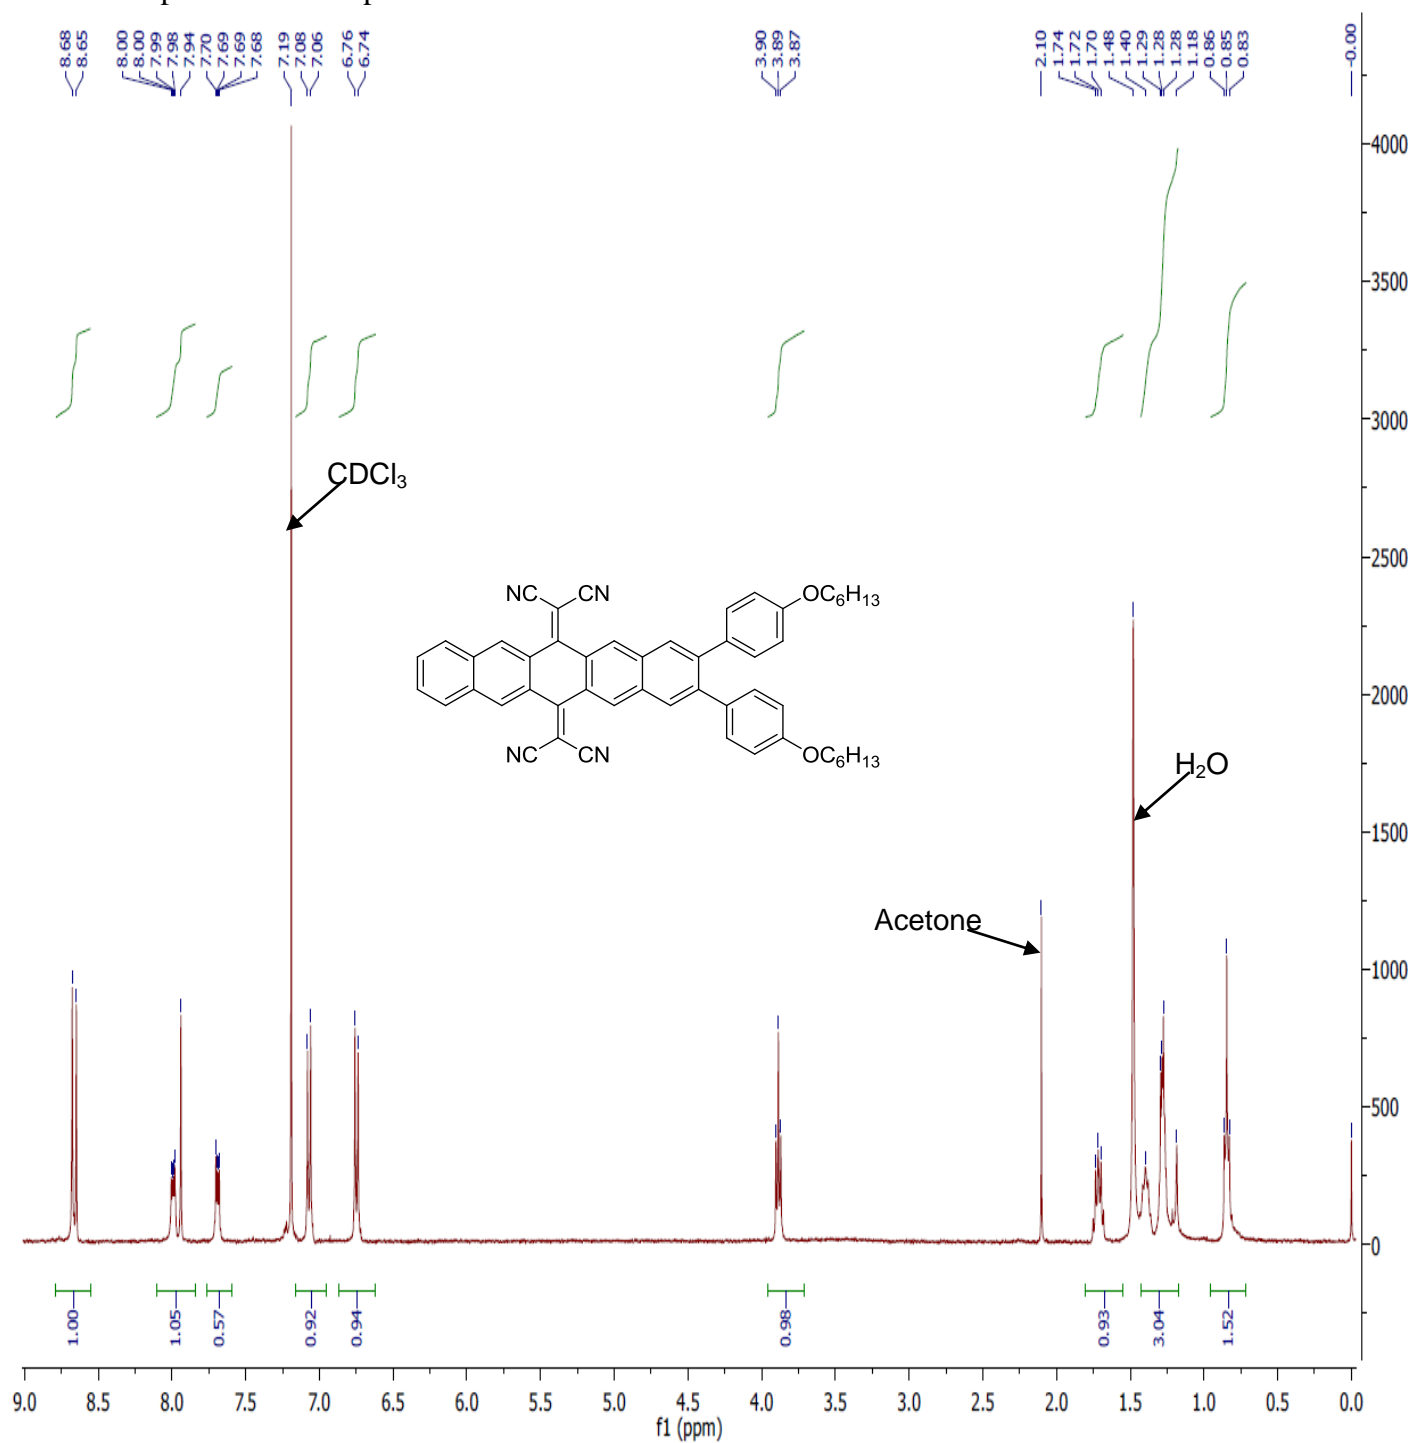

Fig. S44 <sup>1</sup>H NMR spectrum of compound **6**.

$^{13}\text{C}$  NMR spectrum of compound **6**

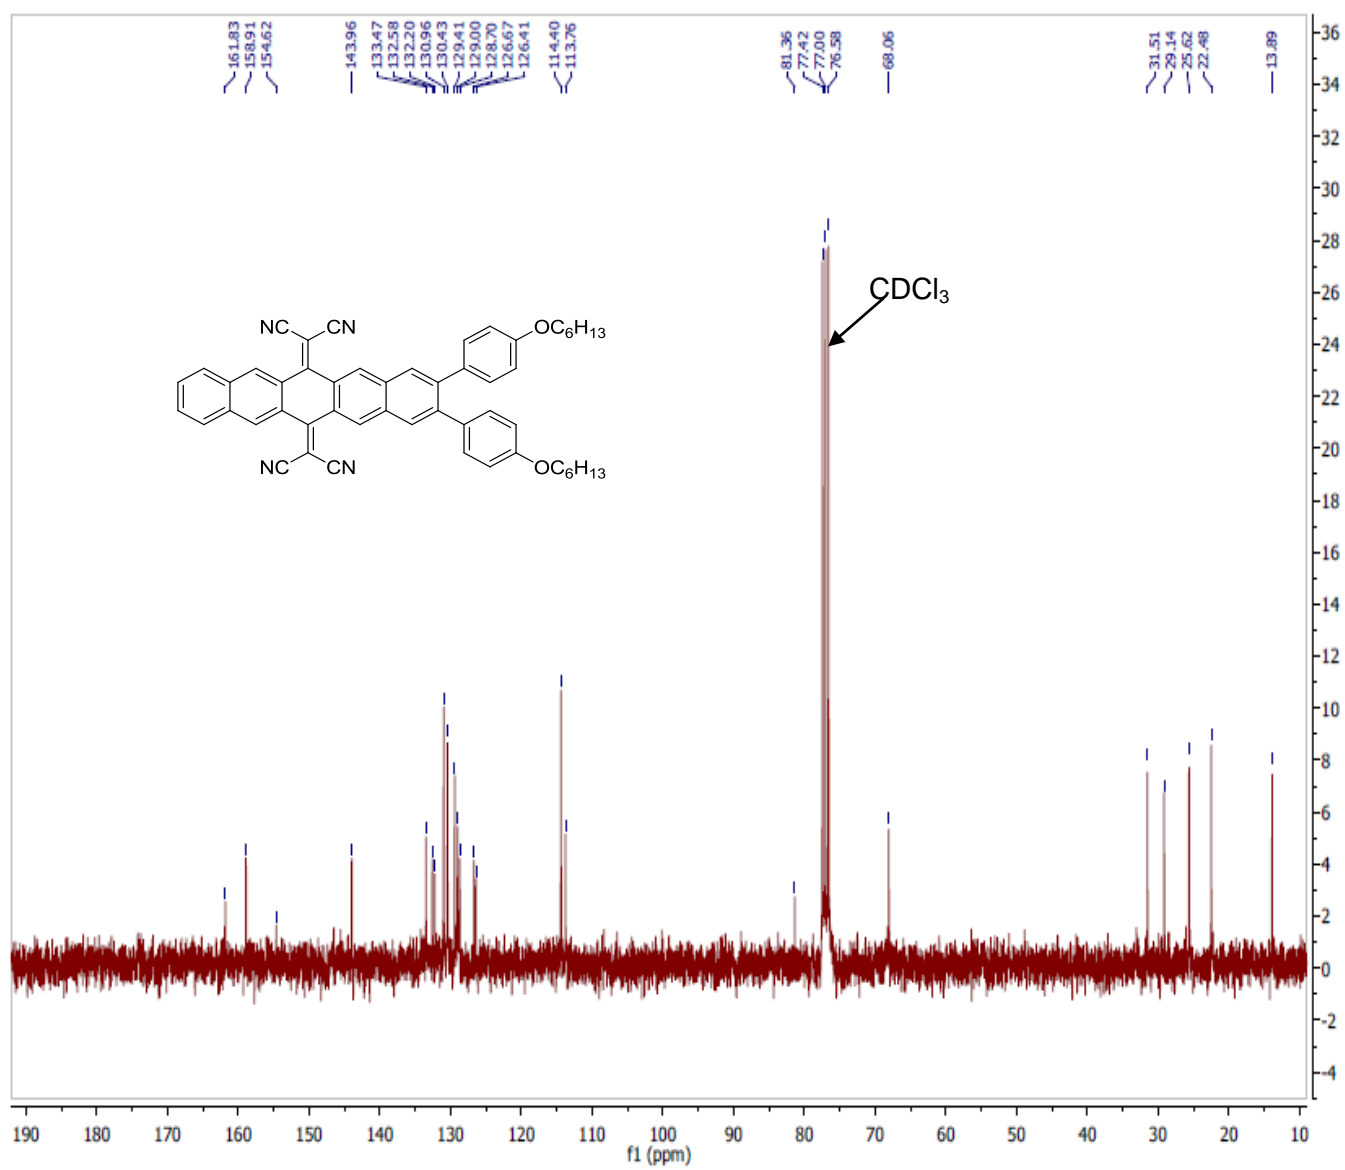

Fig. S45  $^{13}\text{C}$  NMR spectrum of compound **6**.

Mass spectrum of compound 6

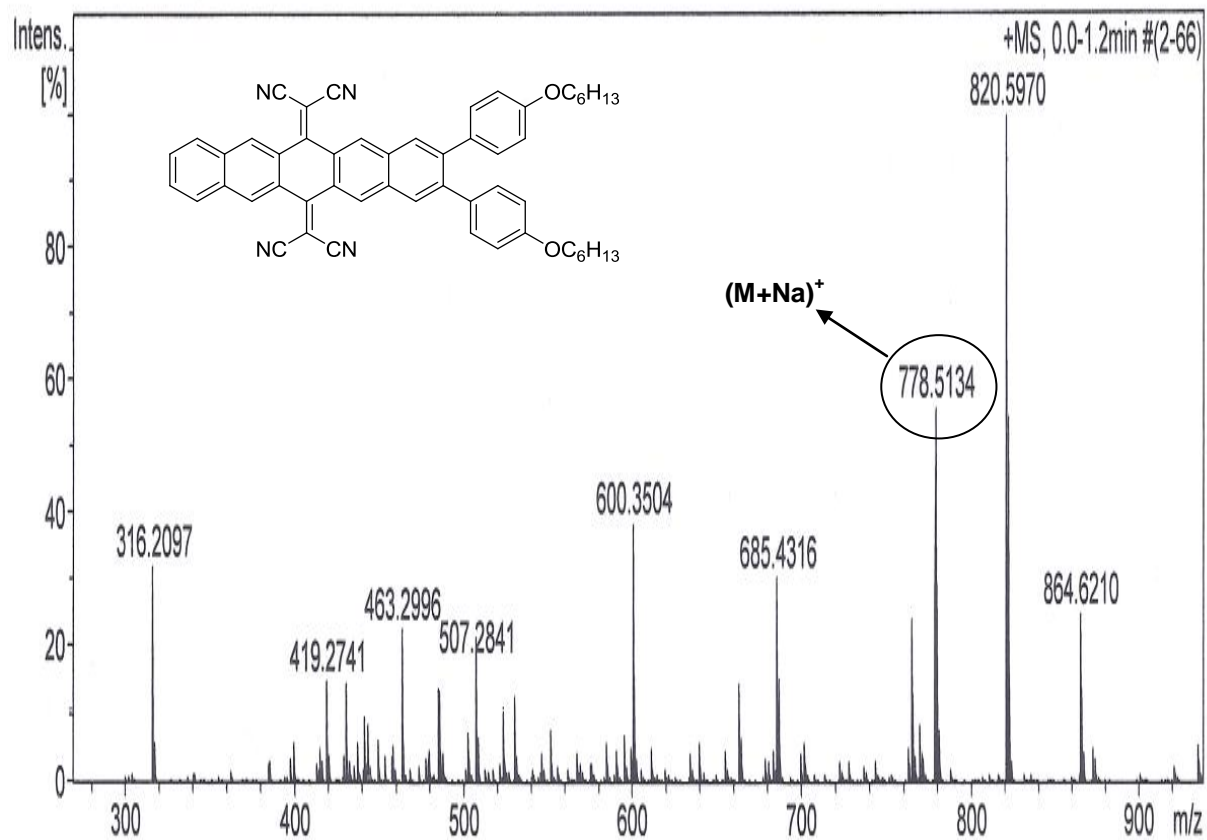

Fig. S46 Mass spectrum of compound 6



**Table S4:** Comparison of relative efficiency of gold nanoparticles of derivative **3** over reported procedure in literature for the reduction of *p*-nitroaniline to *p*-phenylenediamine by iron metal.

| Reaction time for the reduction of <i>p</i> -nitroaniline to <i>p</i> -phenylenediamine | catalyst                       | Journal                                                       |
|-----------------------------------------------------------------------------------------|--------------------------------|---------------------------------------------------------------|
| 5 min.                                                                                  | Gold nanoparticles             | Present manuscript                                            |
| 2.0 hours                                                                               | Fe-Nano-ZSM-5                  | Ind. Eng. Chem. Res. <b>2013</b> , <i>52</i> , 11479          |
| 10.0 hours                                                                              | Fe-phenanthroline/C            | Chem. Commun., <b>2011</b> , <i>47</i> , 10972                |
| 3.0 hours                                                                               | Iron(II) chloride tetrahydrate | Tetrahedron Lett. <b>2008</b> , <i>49</i> 1828                |
| 30 min.                                                                                 | Fe <sup>2+</sup> ions          | Journal of Hazardous Materials <b>2008</b> , <i>153</i> , 187 |
